# Supplementary material for: SO2F2-mediated transformation of 2'-hydroxyacetophenones to benzo-oxetes
Source: PubMed Central journal article supplement (PMC6541378; doi:10.3762/bjoc.15.95), 2019-04-25

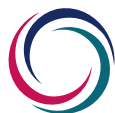

## Supporting Information

for

### **SO<sub>2</sub>F<sub>2</sub>-mediated transformation of 2'-hydroxyacetophenones to benzo-oxetes**

Revathi Lekkala, Ravindar Lekkala, Balakrishna Moku, K. P. Rakesh and Hua-Li Qin

*Beilstein J. Org. Chem.* **2019**, *15*, 976–980. doi:10.3762/bjoc.15.95

### **Conditions optimization, characterization data and copies of NMR spectra**

## **Table of contents**

|                                                      |     |
|------------------------------------------------------|-----|
| 1. General consideration .....                       | S2  |
| 2. Screening for optimized reaction conditions ..... | S3  |
| 3. General procedure .....                           | S5  |
| 4. Product characterization.....                     | S6  |
| 5. NMR spectra .....                                 | S14 |

## 1. General considerations

All reactions were carried out in dried glassware. Unless otherwise stated, NMR spectra were recorded in CDCl<sub>3</sub> on a 500 MHz (for <sup>1</sup>H), 126 MHz (for <sup>13</sup>C) spectrometer. All chemical shifts were reported in ppm relative to TMS (<sup>1</sup>H NMR, 0 ppm) as internal standards. All the yields mentioned were isolated. The coupling constants were reported in hertz (Hz). The following abbreviations were used to explain the multiplicities: s = singlet, d = doublet, t = triplet, q = quartet, m = multiplet, br = broad. Melting points measured are uncorrected. Unless otherwise noted, reagents and solvents used in this work were purchased from commercial sources and used as received.

## 2. Screening for optimized reaction conditions

**Table S1: Screening the solvent.<sup>a</sup>**

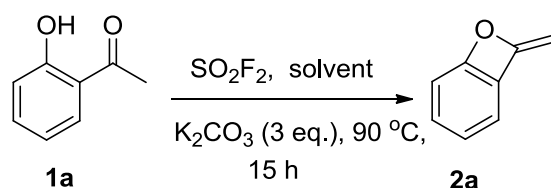

| Entry | Solvent     | Yield ( <b>2a</b> , %) <sup>b</sup> |
|-------|-------------|-------------------------------------|
| 1     | DMF         | 20                                  |
| 2     | <b>DMSO</b> | <b>90</b>                           |
| 3     | MeCN        | 0                                   |
| 4     | Acetone     | 0                                   |

<sup>a</sup>Reaction conditions: a mixture of 1-(2-hydroxyphenyl)ethanone (**1a**, 1.0 mmol, 1.0 equiv),  $\text{K}_2\text{CO}_3$  (3.0 mmol, 3.0 equiv), solvent (2.0 mL) was stirred at  $90\text{ }^\circ\text{C}$ , charged with a  $\text{SO}_2\text{F}_2$  balloon for 15 h. <sup>b</sup>Isolated yields.

**Table S2. Screening the base.<sup>a</sup>**

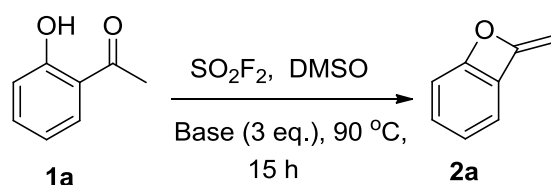

| Entry | Base                                      | Yield ( <b>2a</b> , %) <sup>b</sup> |
|-------|-------------------------------------------|-------------------------------------|
| 1     | KOAc                                      | 76                                  |
| 2     | <b><math>\text{K}_2\text{CO}_3</math></b> | <b>90</b>                           |
| 3     | NaOEt                                     | 50                                  |
| 4     | NaOH                                      | 76                                  |
| 5     | NaOAc                                     | 50                                  |

<sup>a</sup>Reaction conditions: a mixture of 1-(2-hydroxyphenyl)ethanone (**1a**, 1.0 mmol, 1.0 equiv), base (3.0 mmol, 3.0 equiv), DMSO (2.0 mL) was stirred at  $90\text{ }^\circ\text{C}$ , charged with a  $\text{SO}_2\text{F}_2$  balloon for 15 h. <sup>b</sup>Isolated yields.

**Table S3. Screening the reaction time.<sup>a</sup>**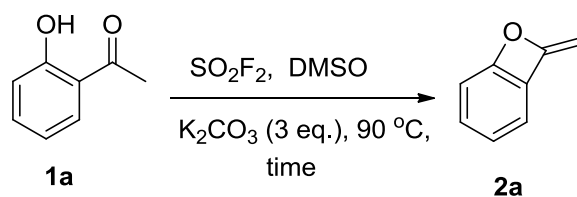

| Entry    | Time (h)  | Yield ( <b>2a</b> , %) <sup>b</sup> |
|----------|-----------|-------------------------------------|
| 1        | 5         | 76                                  |
| 2        | 15        | 90                                  |
| 3        | 18        | 94                                  |
| <b>4</b> | <b>20</b> | <b>98</b>                           |

<sup>a</sup>Reaction conditions: a mixture of 1-(2-hydroxyphenyl)ethanone (**1a**, 1.0 mmol, 1.0 equiv),  $\text{K}_2\text{CO}_3$  (3.0 mmol, 3.0 equiv), DMSO (2.0 mL) was stirred at  $90\text{ }^\circ\text{C}$ , charged with a  $\text{SO}_2\text{F}_2$  balloon for 5–20 h. <sup>b</sup>Isolated yields.

**Table S4. Screening the base loading.<sup>a</sup>**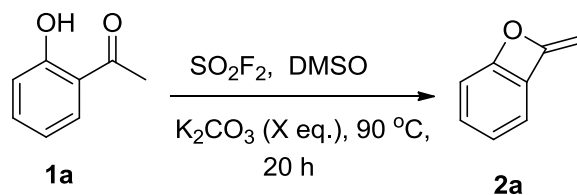

| Entry    | $\text{K}_2\text{CO}_3$ (eq.) | Yield ( <b>2a</b> , %) <sup>b</sup> |
|----------|-------------------------------|-------------------------------------|
| 1        | 1                             | 59                                  |
| 2        | 1.5                           | 72                                  |
| 3        | 2                             | 81                                  |
| 4        | 2.5                           | 89                                  |
| <b>5</b> | <b>3</b>                      | <b>98</b>                           |

<sup>a</sup>Reaction conditions: a mixture of 1-(2-hydroxyphenyl)ethanone (**1a**, 1.0 mmol, 1.0 equiv),  $\text{K}_2\text{CO}_3$  (X mmol, X equiv), DMSO (2.0 mL) was stirred at  $90\text{ }^\circ\text{C}$ , charged with a  $\text{SO}_2\text{F}_2$  balloon for 20 h. <sup>b</sup>Isolated yields.

**Table S5. Screening the reaction temperature.<sup>a</sup>**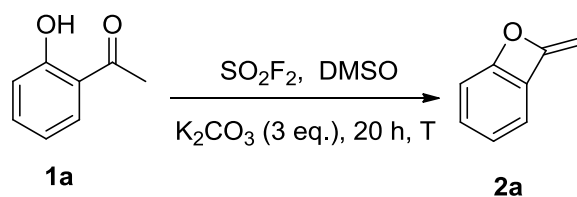

| Entry    | T (°C)    | Yield ( <b>2a</b> , %) <sup>b</sup> |
|----------|-----------|-------------------------------------|
| 1        | 50        | 60                                  |
| 2        | 70        | 72                                  |
| 3        | 80        | 91                                  |
| <b>4</b> | <b>90</b> | <b>98</b>                           |

<sup>a</sup>Reaction conditions: a mixture of 1-(2-hydroxyphenyl)ethanone (**1a**, 1.0 mmol, 1.0 equiv),  $\text{K}_2\text{CO}_3$  (3.0 mmol, 3.0 equiv), DMSO (2.0 mL) was stirred at the corresponding temperature, charged with a  $\text{SO}_2\text{F}_2$  balloon for 20 h. <sup>b</sup>Isolated yields.

### 3. General procedure

#### General procedure for the synthesis of benzo-oxetes

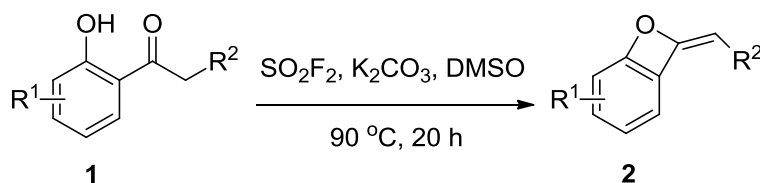

An oven-dried reaction flask (25 mL) containing a stirring bar was charged with 2-hydroxyacetophenone (**1**, 1.0 mmol, 1.0 equiv) and  $\text{K}_2\text{CO}_3$  (3.0 mmol, 3.0 equiv) and the tube was then sealed with a septum. Then DMSO (2.0 mL) was added through a syringe and  $\text{SO}_2\text{F}_2$  gas (sulfuryl fluoride) was introduced by a needle from a balloon filled with the gas (degassed with  $\text{SO}_2\text{F}_2$  for 10–30 s). The reaction mixture was vigorously stirred at 90 °C for 20 h. When the 2-hydroxyacetophenone was consumed (monitoring by TLC), the mixture was diluted with water (50 mL) and extracted with EtOAc (3 × 10 mL). The combined organic layer was washed with brine (25 mL), dried over anhydrous  $\text{Na}_2\text{SO}_4$ , and concentrated to dryness. The residue was purified by silica gel chromatography through gradient elution with EtOAc/petroleum ether to afford pure products **2**.

#### 4. Product characterization

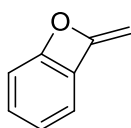

**2a**

8-Methylene-7-oxabicyclo[4.2.0]octa-1(6),2,4-triene (**2a**). Petroleum ether/ethyl acetate = 10:1 (v/v) as eluent for column chromatography. Yellow liquid (116 mg from 1-(2-hydroxyphenyl)ethanone **1a**, isolated yield 98%). IR (neat):  $\gamma_{\max}$ : 3090, 1674, 1580, 882  $\text{cm}^{-1}$ ;  $^1\text{H}$  NMR (500 MHz,  $\text{CDCl}_3$ )  $\delta$  7.63 (dd,  $J = 8$  Hz,  $J = 0.5$  Hz, 1H), 7.48-7.45 (m, 1H), 7.31 (t,  $J = 7.5$  Hz, 1H), 7.15 (d,  $J = 8.5$  Hz, 1H), 5.52 (d,  $J = 4$  Hz, 1H), 5.24 (d,  $J = 4$  Hz, 1H).  $^{13}\text{C}$  NMR (126 MHz,  $\text{CDCl}_3$ )  $\delta$  150.7, 148.6, 132.3, 126.6, 125.1, 118.9, 115.8, 99.0. ESI-MS HRMS calculated for  $\text{C}_8\text{H}_6\text{O}$   $[\text{M}+\text{H}]^+$  119.0497, found. 119.0494. Rf = 0.3 (10:1, PE/EA).

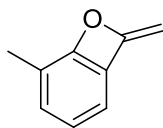

**2b**

5-Methyl-8-methylene-7-oxabicyclo[4.2.0]octa-1(6),2,4-triene (**2b**). Petroleum ether/ethyl acetate = 15:1 (v/v) as eluent for column chromatography. Red liquid (69 mg from 1-(2-hydroxy-3-methylphenyl)ethanone **1b**, isolated yield 52%). IR (neat):  $\gamma_{\max}$ : 3051, 2941, 1643, 1593, 863  $\text{cm}^{-1}$ ;  $^1\text{H}$  NMR (500 MHz,  $\text{CDCl}_3$ )  $\delta$  7.45 (dd,  $J = 8$  Hz,  $J = 1$  Hz, 1H), 7.30 (d,  $J = 7.5$  Hz, 1H), 7.19-7.16 (m, 1H), 5.48 (d,  $J = 4$  Hz, 1H), 5.21 (d,  $J = 4$  Hz, 1H), 2.33 (s, 3H).  $^{13}\text{C}$  NMR (126 MHz,  $\text{CDCl}_3$ )  $\delta$  150.9, 147.3, 133.6, 128.5, 126.0, 122.7, 115.5, 98.8, 15.3. ESI-MS HRMS calculated for  $\text{C}_9\text{H}_8\text{O}$   $[\text{M}+\text{H}]^+$  133.0653, found. 133.0655. Rf = 0.4 (10:1, PE/EA).

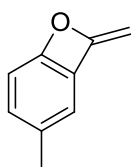

**2c**

3-Methyl-8-methylene-7-oxabicyclo[4.2.0]octa-1(6),2,4-triene (**2c**). Petroleum ether/ethyl acetate = 15:1 (v/v) as eluent for column chromatography. Reddish black liquid (127 mg from 1-(2-hydroxy-5-methylphenyl)ethanone **1c**, isolated yield 96%). IR (neat):  $\gamma_{\max}$ : 3083, 2831, 1655, 1583, 844  $\text{cm}^{-1}$ ;  $^1\text{H}$  NMR (500 MHz,  $\text{CDCl}_3$ )  $\delta$  7.32 (d,  $J = 1$  Hz, 1H), 7.17 (dd,  $J = 9$  Hz,  $J = 2$  Hz, 1H), 6.95 (d,  $J = 8.5$  Hz, 1H), 5.40 (d,  $J = 4$  Hz, 1H), 5.12 (d,  $J = 4$  Hz, 1H), 2.30 (s, 3H).  $^{13}\text{C}$  NMR (126 MHz,  $\text{CDCl}_3$ )  $\delta$  149.3, 147.5, 135.1, 127.8, 120.5, 119.5,

117.5, 100.5, 27.7. ESI-MS HRMS calculated for C<sub>9</sub>H<sub>8</sub>O [M+H]<sup>+</sup> 133.0653, found. 133.0658. R<sub>f</sub> = 0.4 (10:1, PE/EA).

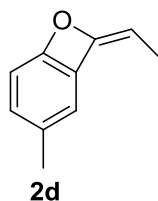

(*E*)-8-Ethylidene-3-methyl-7-oxabicyclo[4.2.0]octa-1(6),2,4-triene (**2d**). Petroleum ether/ethyl acetate = 30:1 (v/v) as eluent for column chromatography. Yellow solid (143 mg from 1-(2-hydroxy-5-methylphenyl)propan-1-one **1d**, isolated yield 98%). M.p. 87-89 °C. IR (neat):  $\gamma_{\max}$ : 3072, 2951, 1637, 1583, 794 cm<sup>-1</sup>; <sup>1</sup>H NMR (500 MHz, CDCl<sub>3</sub>)  $\delta$  7.23 (d, *J* = 1 Hz, 1H), 7.09 (dd, *J* = 8.5 Hz, *J* = 1.5 Hz, 1H), 6.91 (d, *J* = 8.5 Hz, 1H), 5.88 (q, *J* = 7 Hz, 1H), 2.27 (s, 3H), 1.83 (d, *J* = 7 Hz, 3H). <sup>13</sup>C NMR (126 MHz, CDCl<sub>3</sub>)  $\delta$  145.9, 144.9, 136.3, 131.7, 123.9, 118.3, 116.1, 110.5, 21.0, 10.3. ESI-MS HRMS calculated for C<sub>10</sub>H<sub>10</sub>O [M+H]<sup>+</sup> 147.0810, found. 147.0814. R<sub>f</sub> = 0.5 (20:1, PE/EA).

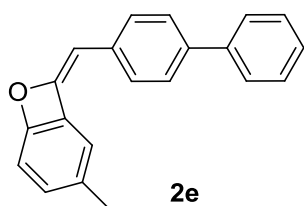

(*E*)-8-([1,1'-Biphenyl]-4-ylmethylene)-3-methyl-7-oxabicyclo[4.2.0]octa-1(6),2,4-triene (**2e**). Petroleum ether/ethyl acetate = 40:1 (v/v) as eluent for column chromatography. White solid (93 mg from 2-([1,1'-biphenyl]-4-yl)-1-(2-hydroxy-5-methylphenyl)ethanone **1e**, isolated yield 33%). M.p. 77-79 °C. IR (neat):  $\gamma_{\max}$ : 3064, 2880, 1673, 1581, 849 cm<sup>-1</sup>; <sup>1</sup>H NMR (500 MHz, CDCl<sub>3</sub>)  $\delta$  7.65-7.61 (m, 7H), 7.48-7.45 (m, 3H), 7.39-7.37 (m, 1H), 7.30-7.28 (m, 1H), 7.22 (dd, *J* = 8.5 Hz, *J* = 1.5 Hz, 1H), 2.40 (s, 3H). <sup>13</sup>C NMR (126 MHz, CDCl<sub>3</sub>)  $\delta$  148.0, 142.0, 140.4, 138.9, 134.2, 132.4, 130.6, 129.0, 127.9, 127.3, 127.2, 121.3, 117.7, 96.1, 83.0, 20.9. ESI-MS HRMS calculated for C<sub>21</sub>H<sub>16</sub>O [M+H]<sup>+</sup> 285.1279, found. 285.1275. R<sub>f</sub> = 0.6 (20:1, PE/EA).

Note: In the <sup>13</sup>C NMR spectrum of **2e**, theoretically, there should be seventeen peaks. Due to the compact overlaying, it is difficult to specify the overlaying peaks.

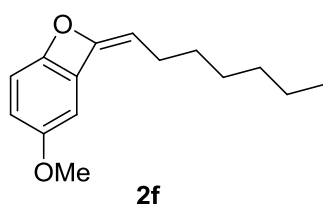



(*E*)-8-Heptylidene-3-methoxy-7-oxabicyclo[4.2.0]octa-1(6),2,4-triene (**2f**). Petroleum ether/ethyl acetate = 15:1 (v/v) as eluent for column chromatography. Yellow liquid (95 mg from 1-(2-hydroxy-5-methoxyphenyl)octan-1-one **1f**, isolated yield 41%). IR (neat):  $\gamma_{\max}$ : 3041, 2930, 1642, 1593, 849  $\text{cm}^{-1}$ ;  $^1\text{H}$  NMR (500 MHz,  $\text{CDCl}_3$ )  $\delta$  7.03 (d,  $J = 9$  Hz, 1H), 6.97 (d,  $J = 2.5$  Hz, 1H), 6.91 (dd,  $J = 9.5$  Hz,  $J = 3$  Hz, 1H), 5.89 (t,  $J = 8$  Hz, 1H), 3.82 (s, 3H), 2.36 (q,  $J = 7.5$  Hz, 2H), 1.52-1.47 (m, 2H), 1.39-1.29 (m, 6H), 0.90 (t,  $J = 7$  Hz, 3H).  $^{13}\text{C}$  NMR (126 MHz,  $\text{CDCl}_3$ )  $\delta$  157.5, 144.0, 142.0, 119.7, 117.2, 117.0, 116.5, 108.0, 56.0, 31.7, 29.0, 24.8, 22.7, 14.2. ESI-MS HRMS calculated for  $\text{C}_{15}\text{H}_{20}\text{O}_2$   $[\text{M}+\text{H}]^+$  233.1542, found. 233.1546.  $R_f = 0.4$  (10:1, PE/EA).

Note: In the  $^{13}\text{C}$  NMR spectrum of **2f**, theoretically, there should be fifteen peaks. Due to the compact overlaying, it is difficult to specify the overlaying peaks.

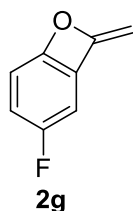

3-Fluoro-8-methylene-7-oxabicyclo[4.2.0]octa-1(6),2,4-triene (**2g**). Petroleum ether/ethyl acetate = 15:1 (v/v) as eluent for column chromatography. Yellow solid (120 mg from 1-(5-fluoro-2-hydroxyphenyl)ethanone **1g**, isolated yield 88%). M.p. 77-79  $^{\circ}\text{C}$ . IR (neat):  $\gamma_{\max}$ : 3081, 1653, 1583, 884  $\text{cm}^{-1}$ ;  $^1\text{H}$  NMR (500 MHz,  $\text{CDCl}_3$ )  $\delta$  7.30 (dd,  $J = 8.5$  Hz,  $J = 2.5$  Hz, 1H), 7.20-7.13 (m, 2H), 5.49 (d,  $J = 4$  Hz, 1H), 5.31 (d,  $J = 4.5$  Hz, 1H).  $^{13}\text{C}$  NMR (126 MHz,  $\text{CDCl}_3$ )  $\delta$  160.1 (d,  $J = 247.0$  Hz), 149.7 (d,  $J = 3.15$  Hz), 144.6 (d,  $J = 2.5$  Hz), 120.7 (d,  $J = 8.6$  Hz), 119.5 (d,  $J = 24.4$  Hz), 117.2 (d,  $J = 8.6$  Hz), 111.5 (d,  $J = 26.5$  Hz), 100.3. ESI-MS HRMS calculated for  $\text{C}_8\text{H}_5\text{OF}$   $[\text{M}+\text{H}]^+$  137.0403, found. 137.0405.  $R_f = 0.4$  (10:1, PE/EA).

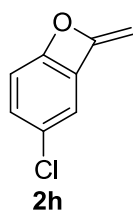

3-Chloro-8-methylene-7-oxabicyclo[4.2.0]octa-1(6),2,4-triene (**2h**). Petroleum ether/ethyl acetate = 15:1 (v/v) as eluent for column chromatography. Yellow liquid (76 mg from 1-(5-chloro-2-hydroxyphenyl)ethanone **1h**, isolated yield 50%). IR (neat):  $\gamma_{\max}$ : 3061, 1673, 1578, 836  $\text{cm}^{-1}$ ;  $^1\text{H}$  NMR (500 MHz,  $\text{CDCl}_3$ )  $\delta$  7.63 (d,  $J = 2.5$  Hz, 1H), 7.56 (d,  $J = 2.5$  Hz, 1H), 7.41 (d,  $J = 8.5$  Hz, 1H), 7.25-7.23 (m, 1H), 6.71 (dd,  $J = 2$  Hz,  $J = 0.5$  Hz, 1H).  $^{13}\text{C}$  NMR

(126 MHz, CDCl<sub>3</sub>)  $\delta$  153.3, 146.4, 129.0, 128.5, 124.7, 120.9, 112.5, 106.4. ESI-MS HRMS calculated for C<sub>8</sub>H<sub>5</sub>OCl [M+H]<sup>+</sup> 153.0107, found. 153.0104. R<sub>f</sub> = 0.4 (10:1, PE/EA).

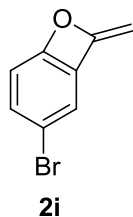

3-Bromo-8-methylene-7-oxabicyclo[4.2.0]octa-1(6),2,4-triene (**2i**). Petroleum ether/ethyl acetate = 20:1 (v/v) as eluent for column chromatography. Yellow solid (165 mg from 1-(5-bromo-2-hydroxyphenyl)ethanone **1i**, isolated yield 85%). M.p. 99-101 °C. IR (neat):  $\gamma_{\max}$ : 3052, 1635, 1588, 783 cm<sup>-1</sup>; <sup>1</sup>H NMR (500 MHz, CDCl<sub>3</sub>)  $\delta$  7.74 (d, *J* = 2.5 Hz, 1H), 7.56 (dd, *J* = 9 Hz, *J* = 2.5 Hz, 1H), 7.04 (d, *J* = 9 Hz, 1H), 5.53 (d, *J* = 4.5 Hz, 1H), 5.31 (d, *J* = 4.5 Hz, 1H). <sup>13</sup>C NMR (126 MHz, CDCl<sub>3</sub>)  $\delta$  149.4, 147.6, 135.1, 127.8, 120.5, 119.5, 117.6, 100.4. ESI-MS HRMS calculated for C<sub>8</sub>H<sub>5</sub>OBr [M+H]<sup>+</sup> 196.9602, found. 196.9606. R<sub>f</sub> = 0.5 (10:1, PE/EA).

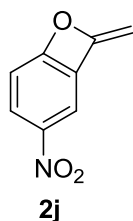

8-Methylene-3-nitro-7-oxabicyclo[4.2.0]octa-1(6),2,4-triene (**2j**). Petroleum ether/ethyl acetate = 10:1 (v/v) as eluent for column chromatography. White solid (51 mg from 1-(2-hydroxy-5-nitrophenyl)ethanone **1j**, isolated yield 31%). M.p. 107-108 °C. IR (neat):  $\gamma_{\max}$ : 3095, 1667, 1581, 881 cm<sup>-1</sup>; <sup>1</sup>H NMR (500 MHz, CDCl<sub>3</sub>)  $\delta$  8.55 (d, *J* = 2.5 Hz, 1H), 8.24 (dd, *J* = 9 Hz, *J* = 2 Hz, 1H), 7.79 (d, *J* = 2.5 Hz, 1H), 7.59 (d, *J* = 9 Hz, 1H), 6.93 (dd, *J* = 2 Hz, *J* = 0.5 Hz, 1H). <sup>13</sup>C NMR (126 MHz, CDCl<sub>3</sub>)  $\delta$  157.9, 148.1, 144.5, 128.0, 120.4, 118.0, 111.9, 107.8. ESI-MS HRMS calculated for C<sub>8</sub>H<sub>5</sub>O<sub>3</sub>N [M+H]<sup>+</sup> 164.0348, found. 164.0345. R<sub>f</sub> = 0.4 (5:1, PE/EA).

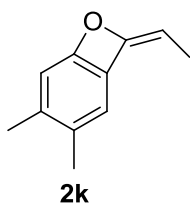

(*E*)-8-Ethylidene-3,4-dimethyl-7-oxabicyclo[4.2.0]octa-1(6),2,4-triene (**2k**). Petroleum ether/ethyl acetate = 30:1 (v/v) as eluent for column chromatography. Yellow liquid (75 mg from 1-(2-hydroxy-4,5-dimethylphenyl)propan-1-one **1k**, isolated yield 47%). IR (neat):  $\gamma_{\max}$ : 3032, 2873, 1654, 1580, 876  $\text{cm}^{-1}$ ;  $^1\text{H}$  NMR (500 MHz,  $\text{CDCl}_3$ )  $\delta$  7.14 (s, 1H), 7.02 (s, 1H), 5.93 (q,  $J = 7$  Hz, 1H), 2.31 (s, 3H), 2.26 (s, 3H), 1.90 (d,  $J = 7$  Hz, 3H).  $^{13}\text{C}$  NMR (126 MHz,  $\text{CDCl}_3$ )  $\delta$  145.2, 144.7, 135.5, 133.2, 127.9, 121.6, 116.0, 110.2, 20.9, 15.2, 10.3. ESI-MS HRMS calculated for  $\text{C}_{11}\text{H}_{12}\text{O}$   $[\text{M}+\text{H}]^+$  161.0966, found. 161.0969.  $R_f = 0.4$  (20:1, PE/EA).

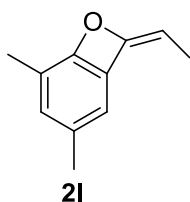

(*E*)-8-Ethylidene-3,5-dimethyl-7-oxabicyclo[4.2.0]octa-1(6),2,4-triene (**2l**). Petroleum ether/ethyl acetate = 30:1 (v/v) as eluent for column chromatography. Yellow liquid (80 mg from 1-(2-hydroxy-3,5-dimethylphenyl)propan-1-one **1l**, isolated yield 50%). IR (neat):  $\gamma_{\max}$ : 3056, 2876, 1641, 1590, 870  $\text{cm}^{-1}$ ;  $^1\text{H}$  NMR (500 MHz,  $\text{CDCl}_3$ )  $\delta$  7.14 (s, 1H), 7.02 (s, 1H), 5.93 (q,  $J = 7$  Hz, 1H), 2.30 (s, 3H), 2.25 (s, 3H), 1.90 (d,  $J = 7$  Hz, 3H).  $^{13}\text{C}$  NMR (126 MHz,  $\text{CDCl}_3$ )  $\delta$  145.1, 144.6, 135.6, 133.2, 127.8, 121.5, 115.9, 110.2, 77.4, 77.2, 76.9, 20.9, 15.2, 10.3. ESI-MS HRMS calculated for  $\text{C}_{11}\text{H}_{12}\text{O}$   $[\text{M}+\text{H}]^+$  161.0966, found. 161.0969.  $R_f = 0.4$  (20:1, PE/EA).

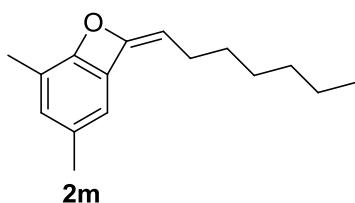

(*E*)-8-Heptylidene-3,5-dimethyl-7-oxabicyclo[4.2.0]octa-1(6),2,4-triene (**2m**). Petroleum ether/ethyl acetate = 40:1 (v/v) as eluent for column chromatography. Yellow liquid (179 mg from 1-(2-hydroxy-3,5-dimethylphenyl)octan-1-one **1m**, isolated yield 78%). IR (neat):  $\gamma_{\max}$ :

3043, 2901, 1610, 1590, 830  $\text{cm}^{-1}$ ;  $^1\text{H}$  NMR (500 MHz,  $\text{CDCl}_3$ )  $\delta$  7.15 (s, 1H), 7.02 (s, 1H), 5.88 (t,  $J = 7.5$  Hz, 1H), 2.37-2.34 (m, 2H), 2.31 (s, 3H), 2.26 (s, 3H), 1.51-1.46 (m, 2H), 1.37-1.31 (m, 6H), 0.90 (s, 3H).  $^{13}\text{C}$  NMR (126 MHz,  $\text{CDCl}_3$ )  $\delta$  144.8, 144.4, 135.5, 133.2, 127.9, 121.6, 115.9, 115.8, 31.7, 29.1, 29.0, 24.8, 22.7, 21.0, 15.3, 14.2. ESI-MS HRMS calculated for  $\text{C}_{16}\text{H}_{22}\text{O}$   $[\text{M}+\text{H}]^+$  231.1749, found. 231.1745. Rf = 0.6 (20:1, PE/EA).

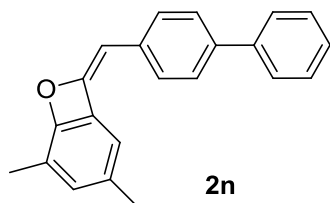

(*E*)-8-([1,1'-Biphenyl]-4-ylmethylene)-3,5-dimethyl-7-oxabicyclo[4.2.0]octa-1(6),2,4-triene (**2n**). Petroleum ether/ethyl acetate = 40:1 (v/v) as eluent for column chromatography. White solid (95 mg from 2-([1,1'-biphenyl]-4-yl)-1-(2-hydroxy-3,5-dimethylphenyl)ethanone **1n**, isolated yield 32%). M.p. 153-154  $^{\circ}\text{C}$ . IR (neat):  $\gamma_{\text{max}}$ : 3090, 2921, 1650, 1593, 807  $\text{cm}^{-1}$ ;  $^1\text{H}$  NMR (500 MHz,  $\text{CDCl}_3$ )  $\delta$  7.84 (d,  $J = 8.5$  Hz, 2H), 7.60-7.55 (m, 4H), 7.38 (t,  $J = 7.5$  Hz, 2H), 7.30-7.27 (m, 1H), 7.11 (s, 1H), 6.88 (s, 1H), 6.83 (s, 1H), 2.48 (s, 3H), 2.33 (s, 3H).  $^{13}\text{C}$  NMR (126 MHz,  $\text{CDCl}_3$ )  $\delta$  155.5, 152.6, 141.1, 140.7, 132.5, 129.9, 129.0, 129.0, 127.6, 127.5, 127.1, 126.8, 125.3, 121.0, 118.3, 101.6, 21.4, 15.2. ESI-MS HRMS calculated for  $\text{C}_{22}\text{H}_{18}\text{O}$   $[\text{M}+\text{H}]^+$  299.1436, found. 299.1432. Rf = 0.6 (20:1, PE/EA).

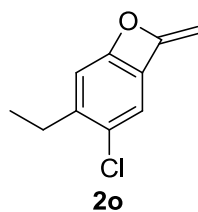

3-Chloro-4-ethyl-8-methylene-7-oxabicyclo[4.2.0]octa-1(6),2,4-triene (**2o**). Petroleum ether/ethyl acetate = 30:1 (v/v) as eluent for column chromatography. Yellow liquid (56 mg from 1-(4-ethyl-2-hydroxy-5-methylphenyl)ethanone **1o**, isolated yield 31%). IR (neat):  $\gamma_{\text{max}}$ : 3031, 2843, 1655, 1580, 787  $\text{cm}^{-1}$ ;  $^1\text{H}$  NMR (500 MHz,  $\text{CDCl}_3$ )  $\delta$  7.58-7.57 (m, 2H), 7.38 (s, 1H), 6.68 (dd,  $J = 2$  Hz,  $J = 1$  Hz, 1H), 2.85 (q,  $J = 7.5$  Hz, 2H), 1.28 (t,  $J = 7.5$  Hz, 3H).  $^{13}\text{C}$  NMR (126 MHz,  $\text{CDCl}_3$ )  $\delta$  154.1, 145.7, 138.0, 128.6, 126.6, 121.3, 111.8, 106.1, 27.4, 14.4. ESI-MS HRMS calculated for  $\text{C}_{10}\text{H}_9\text{OCl}$   $[\text{M}+\text{H}]^+$  181.0420, found. 181.0424. Rf = 0.4 (20:1, PE/EA).

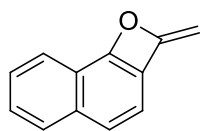

**2p**

2-Methylene-2H-naphtho[1,2-*b*]oxete (**2p**). Petroleum ether/ethyl acetate = 20:1 (v/v) as eluent for column chromatography. Brown solid (160 mg from 1-(1-hydroxynaphthalen-2-yl)ethanone **2p**, reaction was performed at 50 °C (instead of 90 °C), isolated yield 95%). M.p. 87-89 °C. IR (neat):  $\gamma_{\max}$ : 3045, 1659, 1589, 874  $\text{cm}^{-1}$ ;  $^1\text{H}$  NMR (500 MHz,  $\text{CDCl}_3$ )  $\delta$  8.19-8.17 (m, 1H), 7.88-7.85 (m, 1H), 7.74 (d,  $J = 8.5$  Hz, 1H), 7.66-7.63 (m, 2H), 7.56 (d,  $J = 8.5$  Hz, 1H), 5.58 (d,  $J = 4$  Hz, 1H), 5.32 (d,  $J = 4$  Hz, 1H).  $^{13}\text{C}$  NMR (126 MHz,  $\text{CDCl}_3$ )  $\delta$  151.1, 144.7, 135.1, 128.9, 128.2, 128.0, 126.4, 123.9, 121.4, 120.2, 111.0, 99.5. ESI-MS HRMS calculated for  $\text{C}_{12}\text{H}_8\text{O}$   $[\text{M}+\text{H}]^+$  169.0653, found. 169.0656. Rf = 0.3 (20:1, PE/EA).

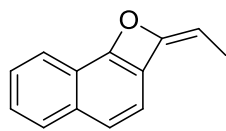

**2q**

(*E*)-2-Ethylidene-2H-naphtho[1,2-*b*]oxete (**2q**). Petroleum ether/ethyl acetate = 30:1 (v / v) as eluent for column chromatography. Yellow solid (164 mg from 1-(1-hydroxynaphthalen-2-yl)propan-1-one **1q**, isolated yield 90%). M.p. 142-144 °C. IR (neat):  $\gamma_{\max}$ : 3075, 2961, 1647, 1582, 854  $\text{cm}^{-1}$ ;  $^1\text{H}$  NMR (500 MHz,  $\text{CDCl}_3$ )  $\delta$  8.14 (d,  $J = 8$  Hz, 1H), 7.84 (d,  $J = 8$  Hz, 1H), 7.69 (d,  $J = 8.5$  Hz, 1H), 7.64-7.58 (m, 2H), 7.49 (d,  $J = 9$  Hz, 1H), 6.06 (q,  $J = 7$  Hz, 1H), 1.99 (d,  $J = 7$  Hz, 3H).  $^{13}\text{C}$  NMR (126 MHz,  $\text{CDCl}_3$ )  $\delta$  148.5, 134.1, 129.1, 128.0, 128.0, 127.5, 127.4, 127.3, 122.2, 116.2, 94.6, 75.0, 4.8. ESI-MS HRMS calculated for  $\text{C}_{13}\text{H}_{10}\text{O}$   $[\text{M}+\text{H}]^+$  183.0810, found. 183.0814. Rf = 0.5 (20:1, PE/EA).

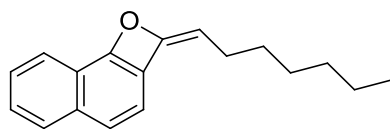

**2r**

(*E*)-2-Heptylidene-2H-naphtho[1,2-*b*]oxete (**2r**). Petroleum ether/ethyl acetate = 30:1 (v/v) as eluent for column chromatography. Yellow liquid (106 mg from 1-(1-hydroxynaphthalen-2-yl)octan-1-one **1r**, isolated yield 42%). IR (neat):  $\gamma_{\max}$ : 3052, 2930, 1678, 1593, 756  $\text{cm}^{-1}$ ;  $^1\text{H}$  NMR (500 MHz,  $\text{CDCl}_3$ )  $\delta$  8.03 (d,  $J = 8.5$  Hz, 1H), 7.86 (d,  $J = 8$  Hz, 1H), 7.78 (d,  $J = 8.5$  Hz, 1H), 7.64 (t,  $J = 7.5$  Hz, 1H), 7.57 (t,  $J = 7.5$  Hz, 1H), 7.50 (d,  $J = 8.5$  Hz, 1H), 2.53 (t,  $J = 7.5$  Hz, 2H), 1.71-1.65 (m, 2H), 1.56-1.49 (m, 3H), 1.35-1.27 (m, 4H), 0.92 (t,  $J = 6.5$  Hz,

3H).  $^{13}\text{C}$  NMR (126 MHz,  $\text{CDCl}_3$ )  $\delta$  147.1, 134.0, 129.1, 128.4, 128.4, 128.2, 127.6, 126.3, 120.9, 116.0, 100.0, 74.6, 31.5, 28.8, 28.5, 22.7, 19.9, 14.2. ESI-MS HRMS calculated for  $\text{C}_{18}\text{H}_{20}\text{O}$   $[\text{M}+\text{H}]^+$  253.1592, found. 253.1595.  $R_f$  = 0.4 (20:1, PE/EA).

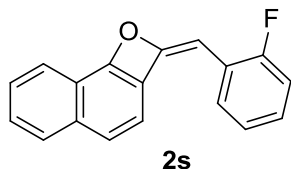

(*E*)-2-(2-Fluorobenzylidene)-2*H*-naphtho[1,2-*b*]oxete (**2s**). Petroleum ether/ethyl acetate = 30:1 (v/v) as eluent for column chromatography. White solid (79 mg from 2-(2-fluorophenyl)-1-(1-hydroxynaphthalen-2-yl)ethanone **1s**, isolated yield 30%). M.p. 99-100 °C. IR (neat):  $\gamma_{\text{max}}$ : 3051, 2936, 1660, 1590, 835  $\text{cm}^{-1}$ ;  $^1\text{H}$  NMR (500 MHz,  $\text{CDCl}_3$ )  $\delta$  8.41 (d,  $J$  = 8 Hz, 1H), 8.18 (t,  $J$  = 7.5 Hz, 1H), 7.95 (d,  $J$  = 8 Hz, 1H), 7.68 (s, 2H), 7.62 (t,  $J$  = 7.5 Hz, 1H), 7.51 (t,  $J$  = 7.5 Hz, 1H), 7.37 (s, 1H), 7.32-7.29 (m, 2H), 7.22-7.19 (m, 1H).  $^{13}\text{C}$  NMR (126 MHz,  $\text{CDCl}_3$ )  $\delta$  159.445 (d,  $J$  = 252.1 Hz), 149.9, 149.4 (d,  $J$  = 3.4 Hz), 131.9, 129.3 (d,  $J$  = 8.4 Hz), 128.6, 126.9 (d,  $J$  = 2.9 Hz), 126.5, 125.4, 125.1 (d,  $J$  = 1.5 Hz), 124.6 (d,  $J$  = 3.5 Hz), 123.9, 121.4, 120.3, 119.9, 119.2 (d,  $J$  = 11.7 Hz), 116.3 (d,  $J$  = 21.5 Hz), 107.8 (d,  $J$  = 12.6 Hz). ESI-MS HRMS calculated for  $\text{C}_{18}\text{H}_{11}\text{OF}$   $[\text{M}+\text{H}]^+$  263.0872, found. 263.0875.  $R_f$  = 0.5 (20:1, PE/EA).

## 5. NMR spectra

**2a**,  $^1\text{H}$  NMR, 500 MHz,  $\text{CDCl}_3$

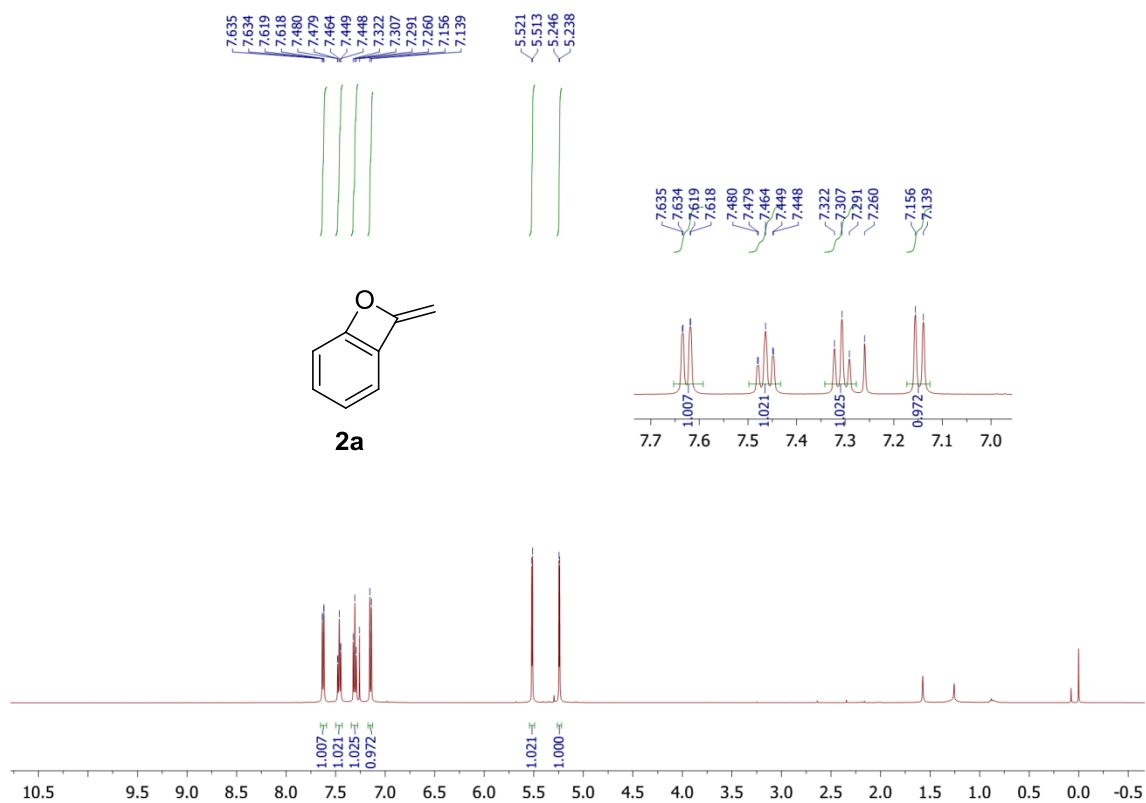

**2a**,  $^{13}\text{C}$  NMR, 126 MHz,  $\text{CDCl}_3$

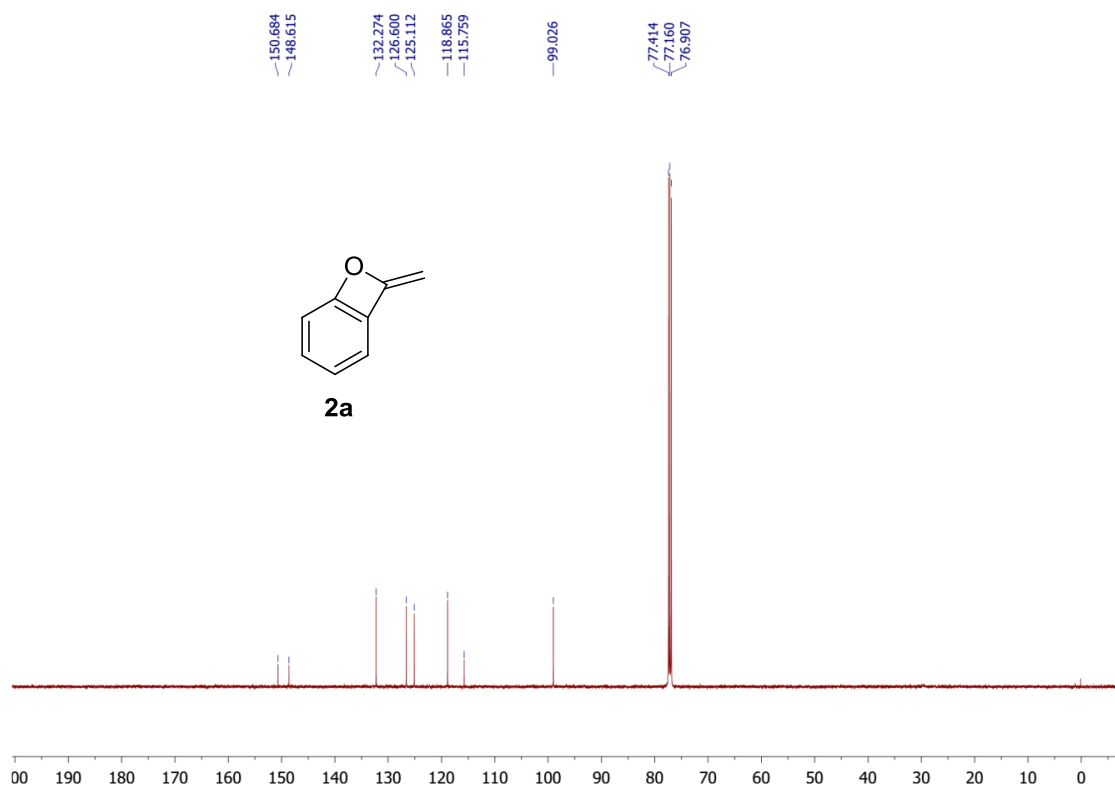

**2b**,  $^1\text{H}$  NMR, 500 MHz,  $\text{CDCl}_3$

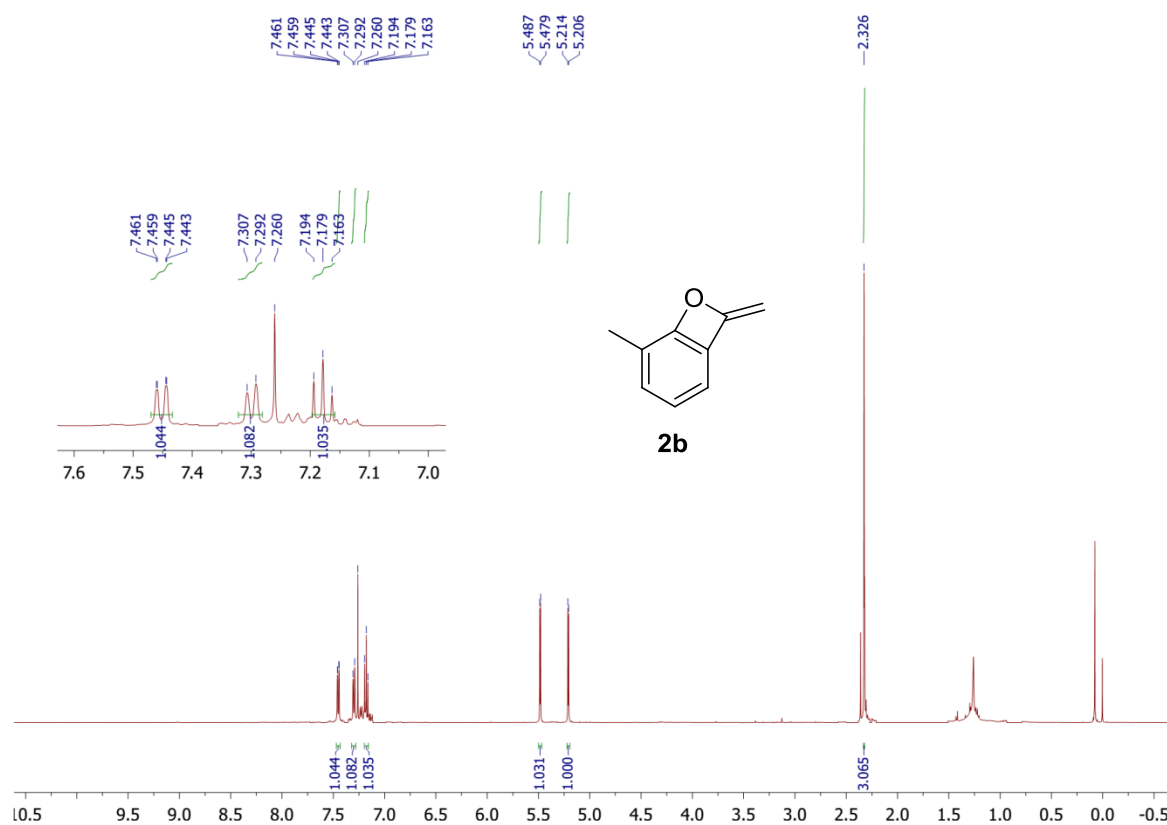

**2b**,  $^{13}\text{C}$  NMR, 126 MHz,  $\text{CDCl}_3$

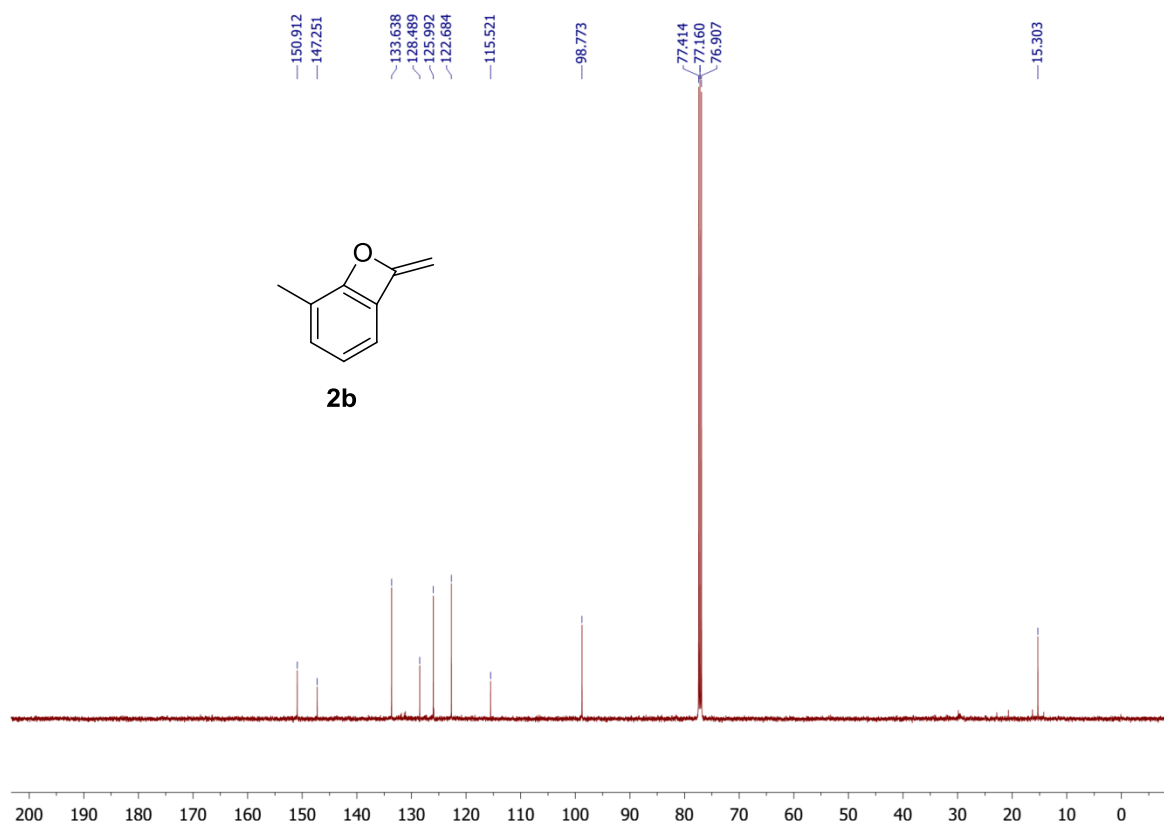



**2c**,  $^1\text{H}$  NMR, 500 MHz,  $\text{CDCl}_3$

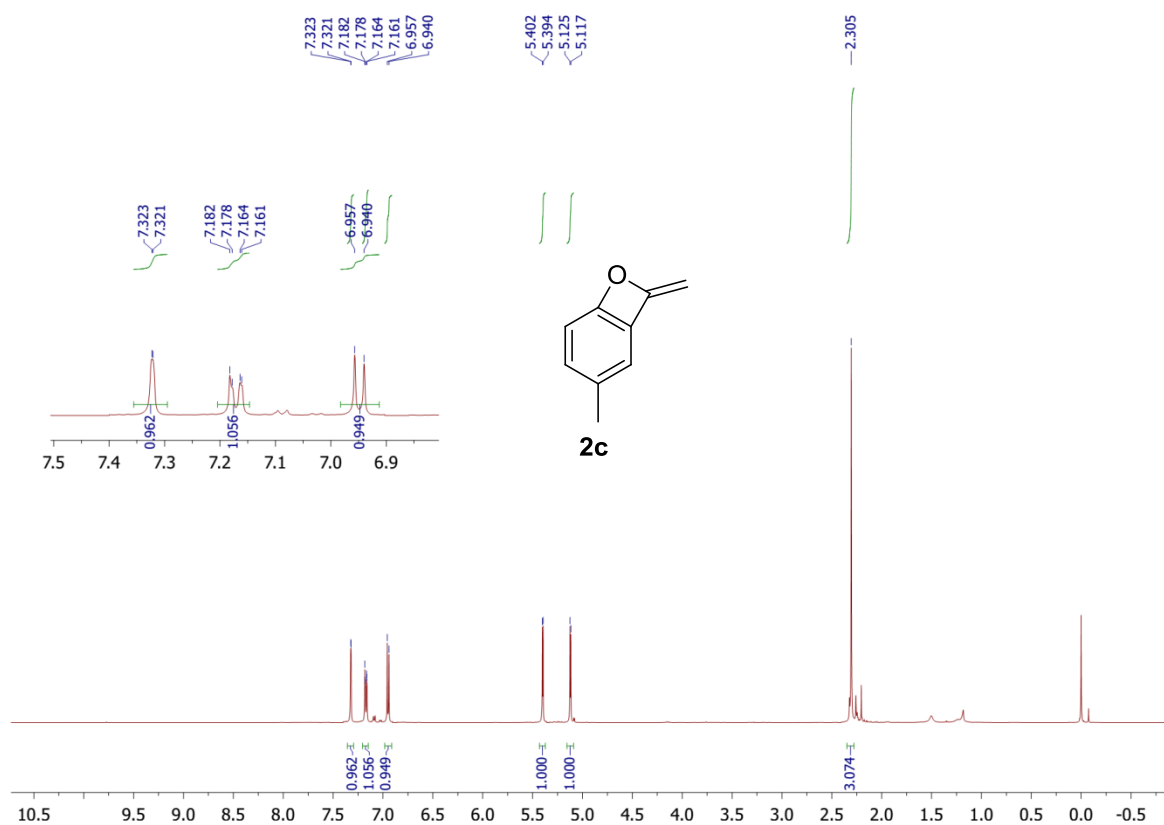

**2c**,  $^{13}\text{C}$  NMR, 126 MHz,  $\text{CDCl}_3$

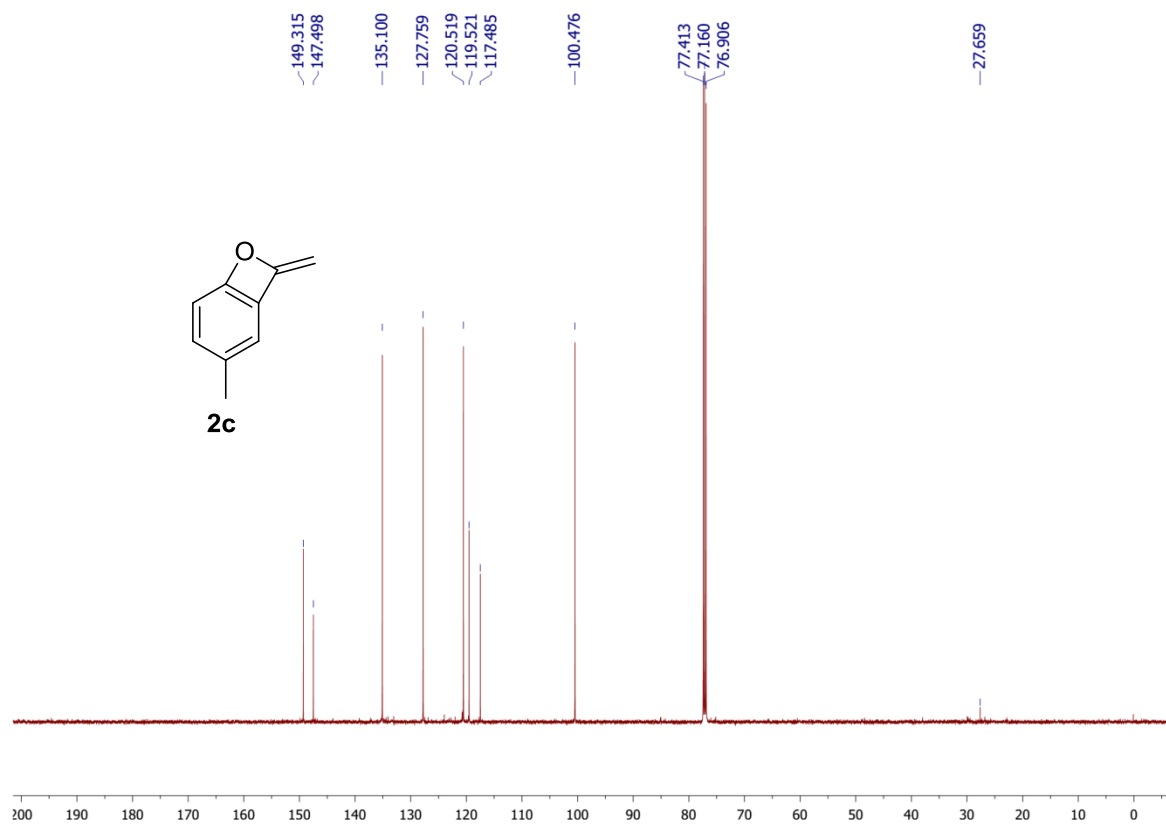

**2d**,  $^1\text{H}$  NMR, 500 MHz,  $\text{CDCl}_3$

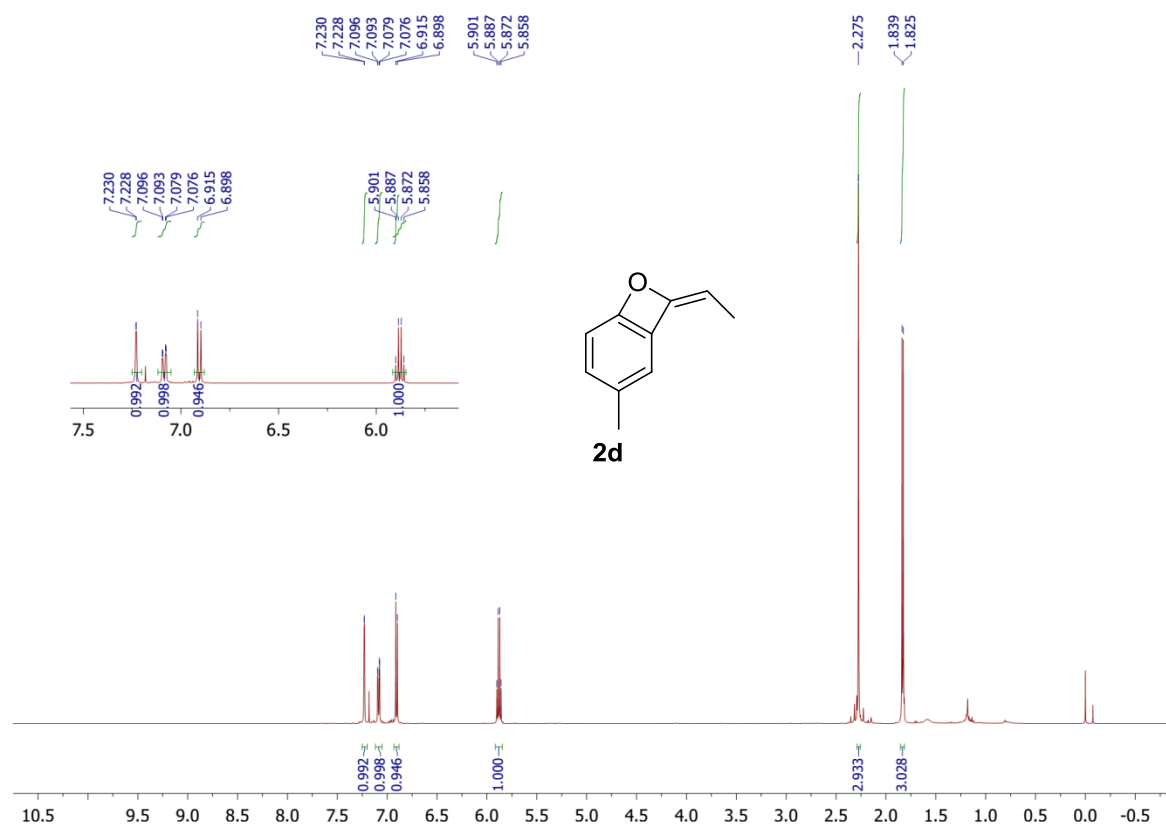

**2d**,  $^{13}\text{C}$  NMR, 126 MHz,  $\text{CDCl}_3$

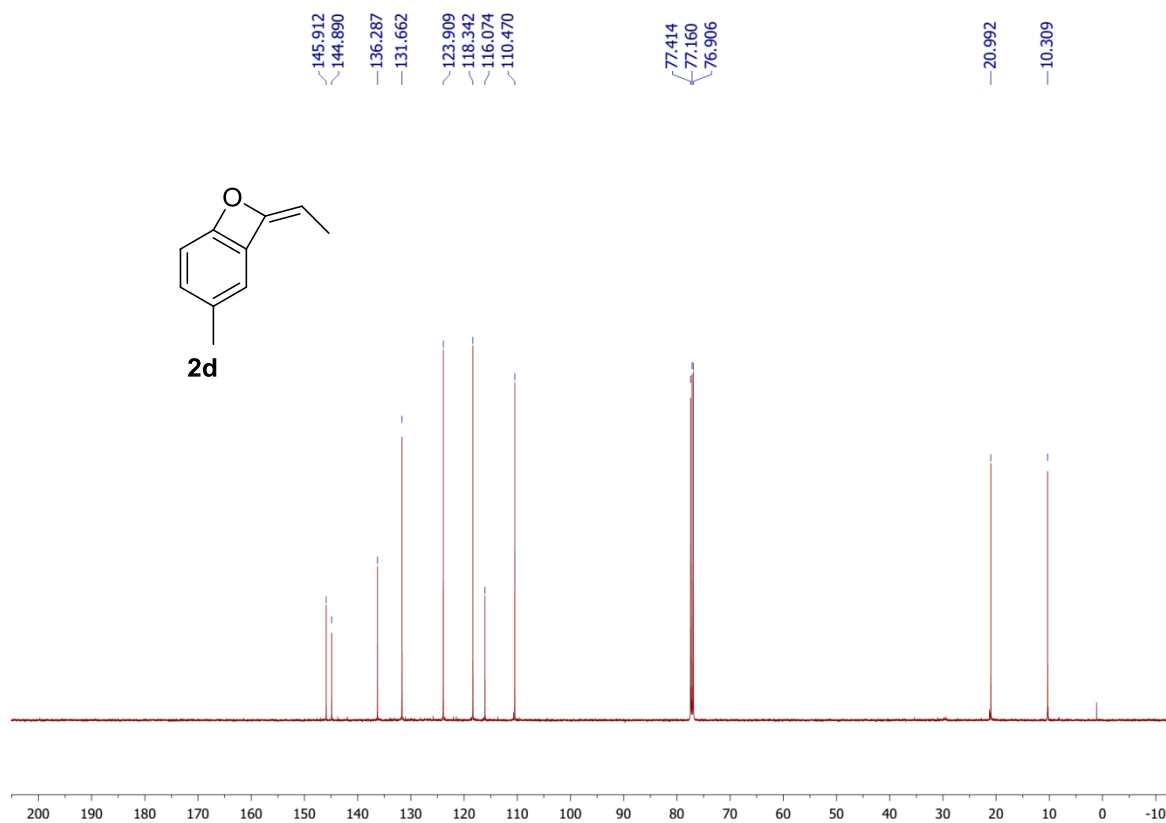

**2e**,  $^1\text{H}$  NMR, 500 MHz,  $\text{CDCl}_3$

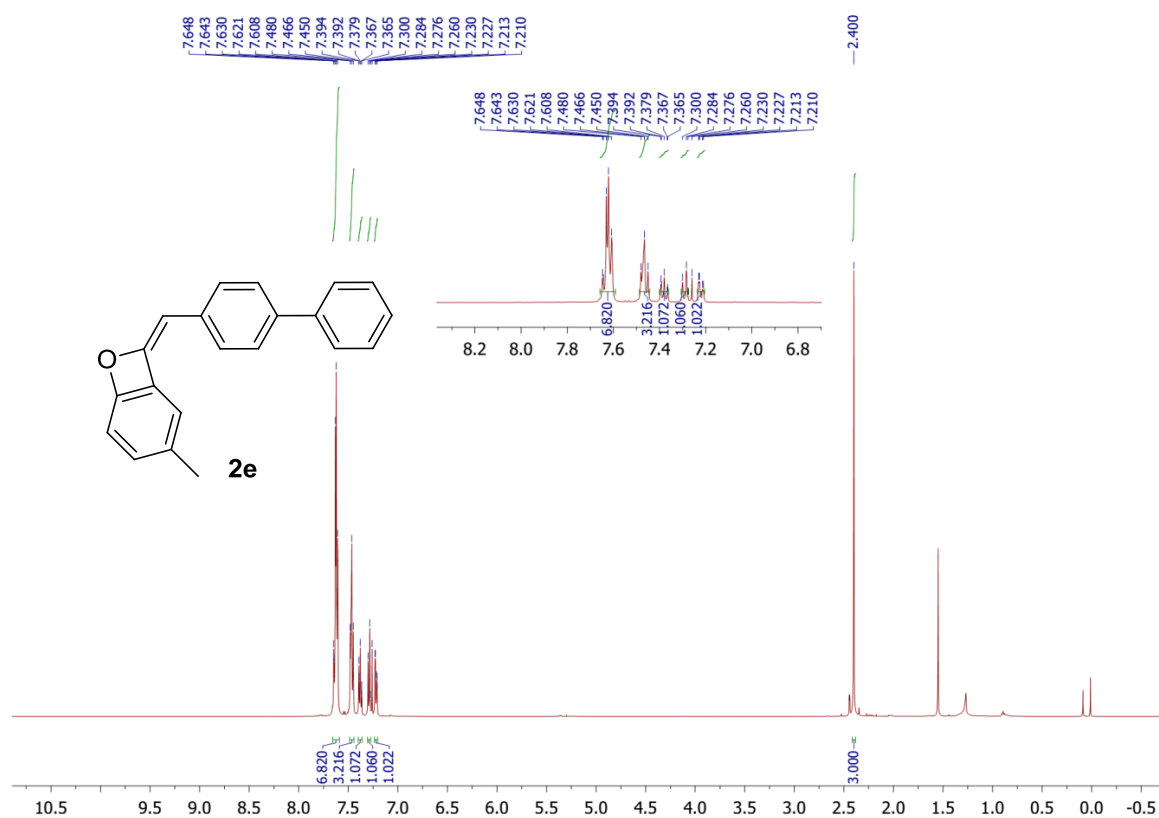

**2e**,  $^{13}\text{C}$  NMR, 126 MHz,  $\text{CDCl}_3$

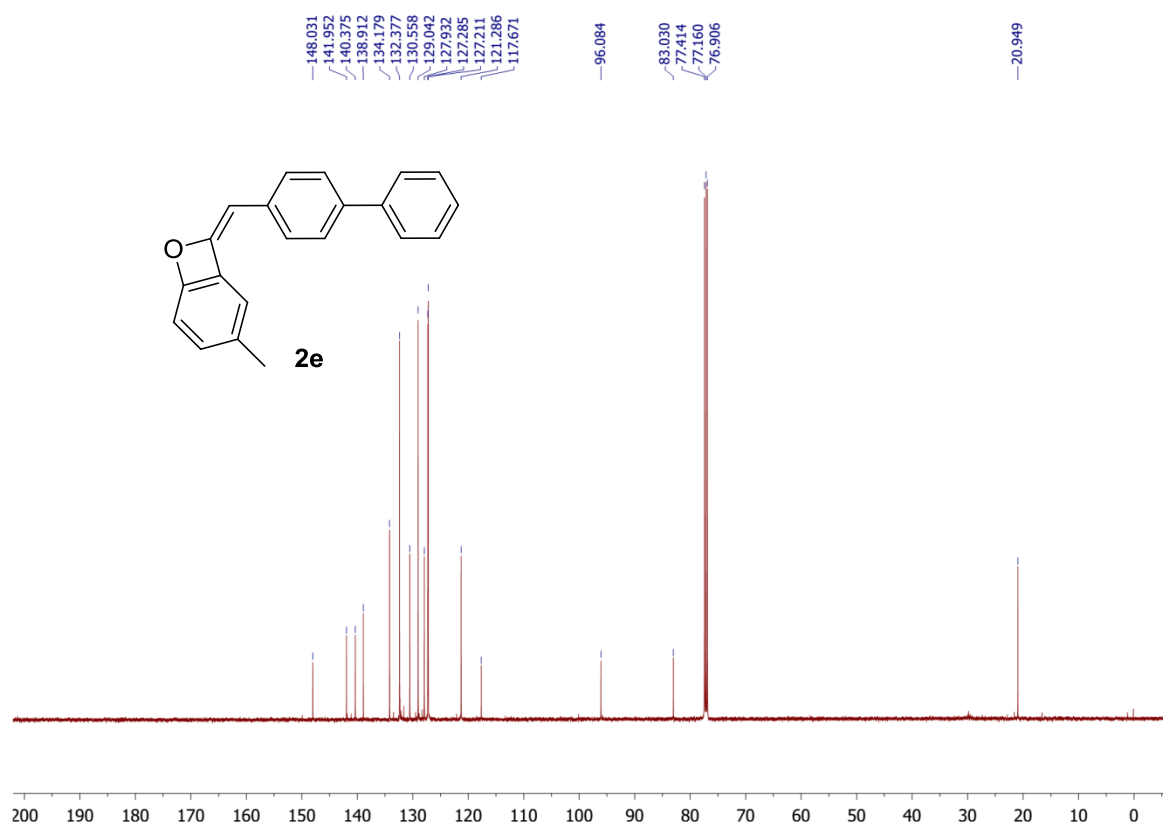

**2f**,  $^1\text{H}$  NMR, 500 MHz,  $\text{CDCl}_3$

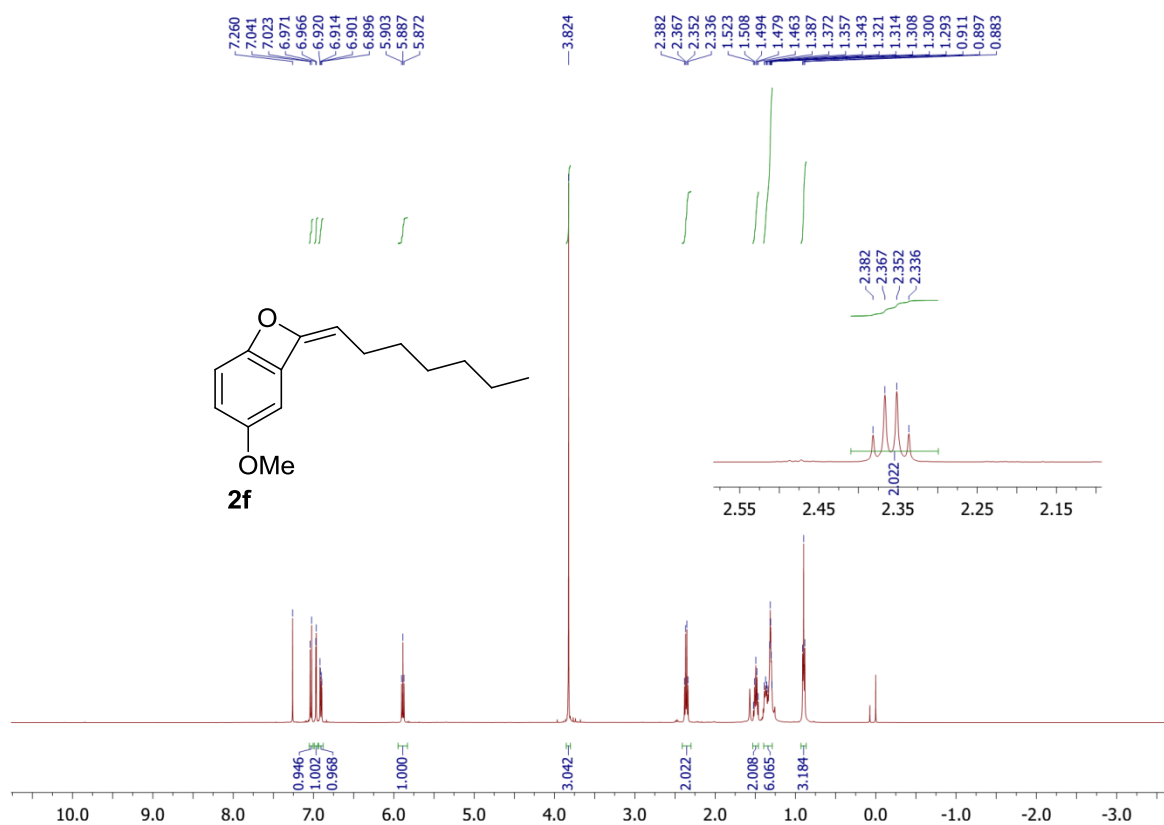

**2f**,  $^{13}\text{C}$  NMR, 126 MHz,  $\text{CDCl}_3$

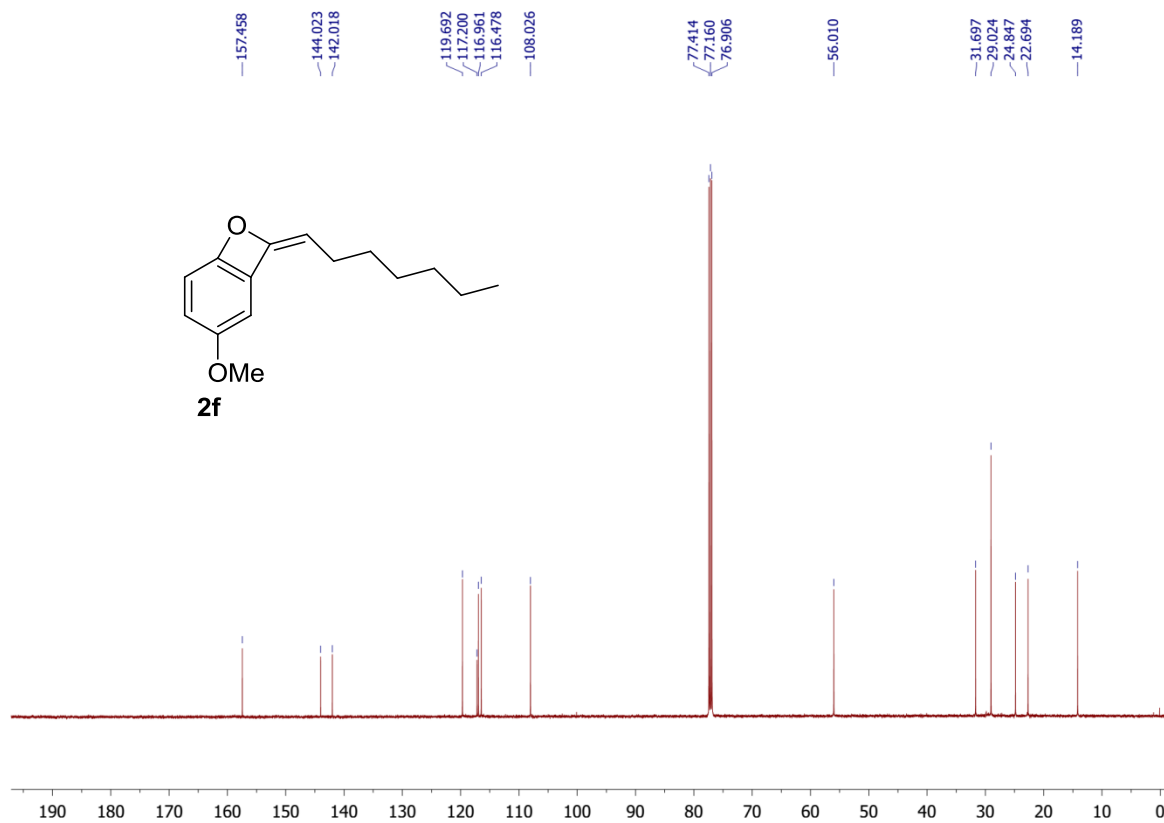

**2g**,  $^1\text{H}$  NMR, 500 MHz,  $\text{CDCl}_3$

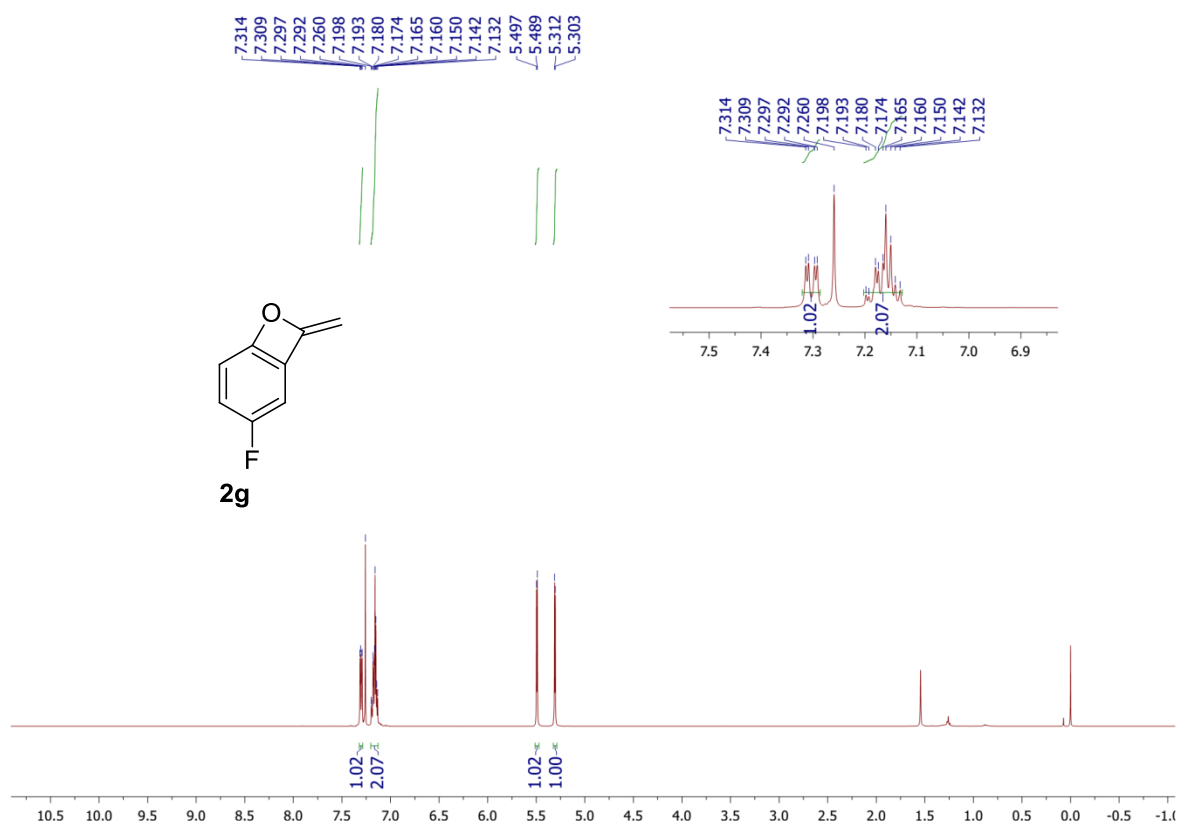

**2g**,  $^{13}\text{C}$  NMR, 126 MHz,  $\text{CDCl}_3$

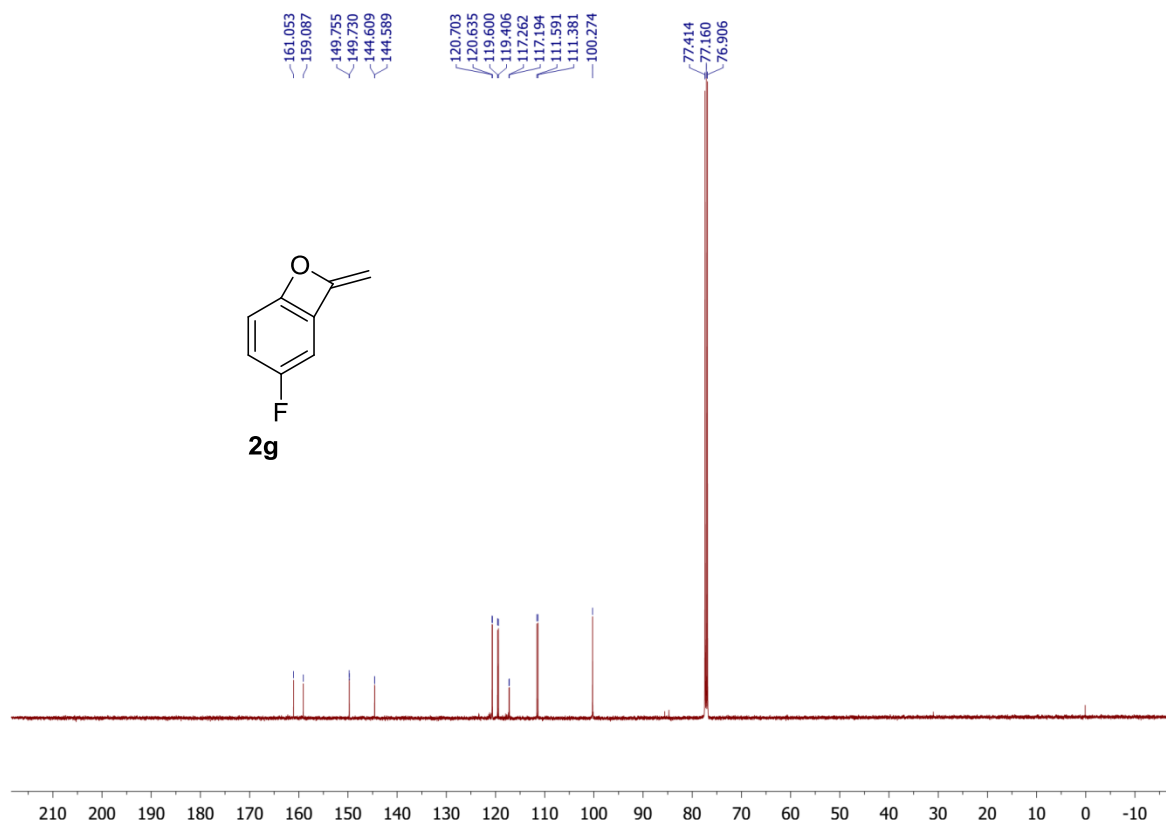

**2h**,  $^1\text{H}$  NMR, 500 MHz,  $\text{CDCl}_3$

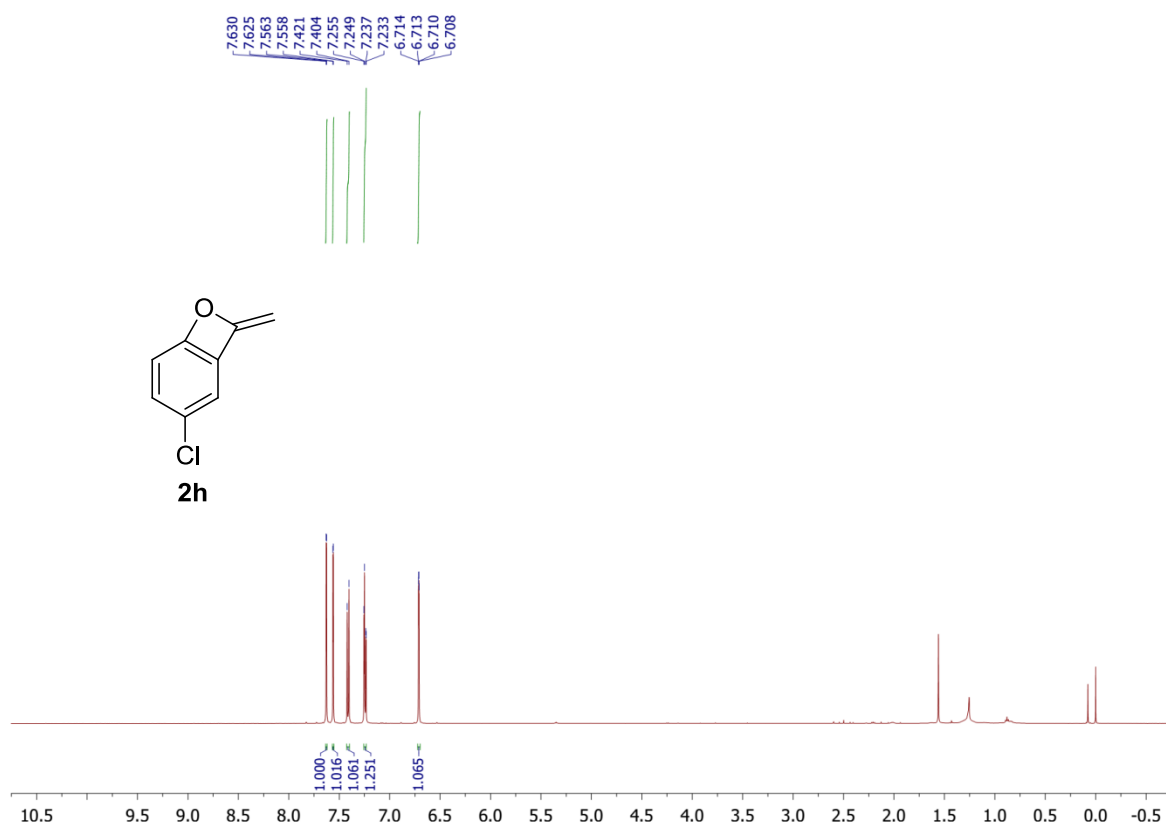

**2h**,  $^{13}\text{C}$  NMR, 126 MHz,  $\text{CDCl}_3$

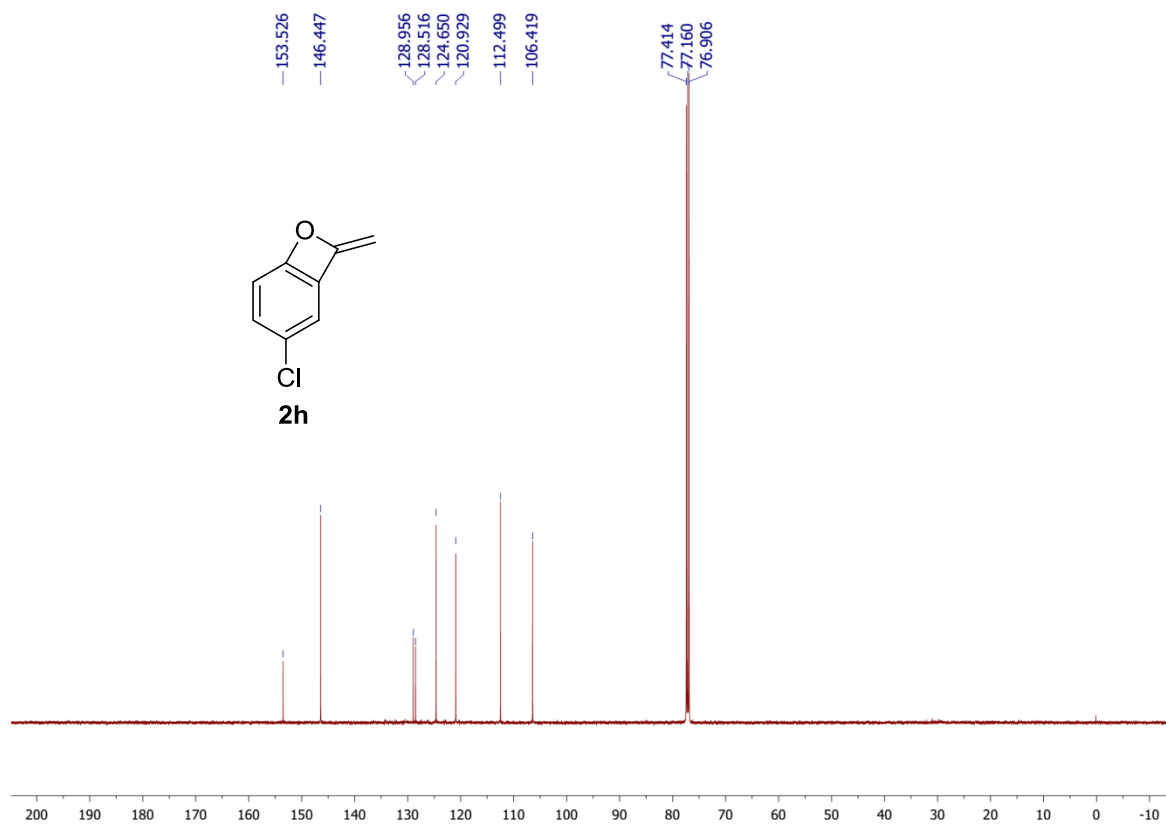

**2i**,  $^1\text{H}$  NMR, 500 MHz,  $\text{CDCl}_3$

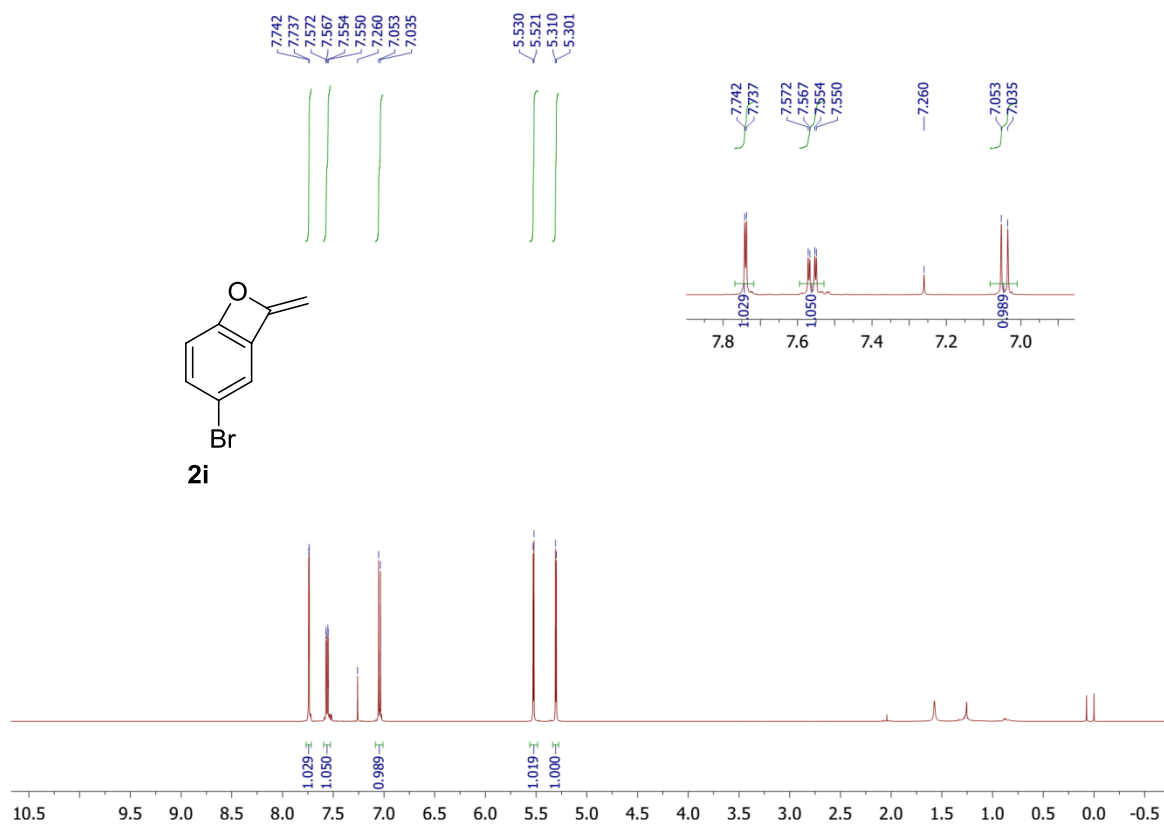

**2i**,  $^{13}\text{C}$  NMR, 126 MHz,  $\text{CDCl}_3$

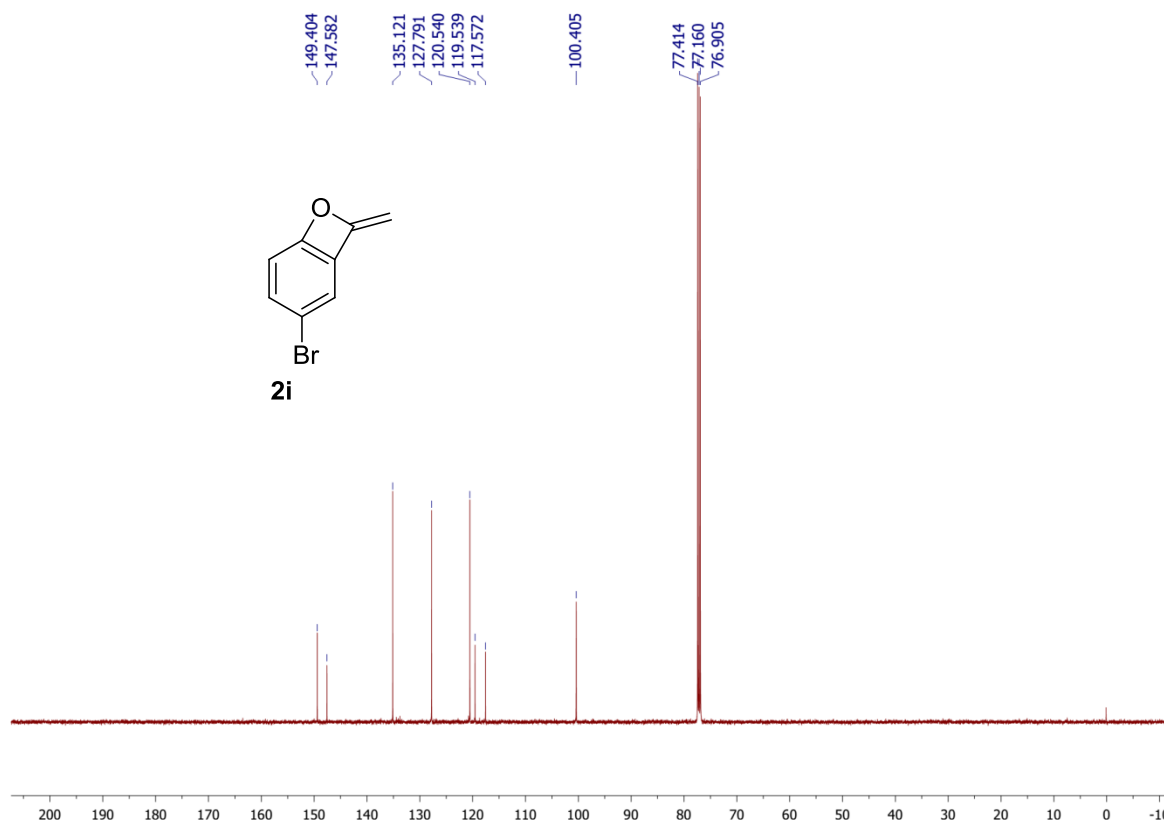

**2j**,  $^1\text{H}$  NMR, 500 MHz,  $\text{CDCl}_3$

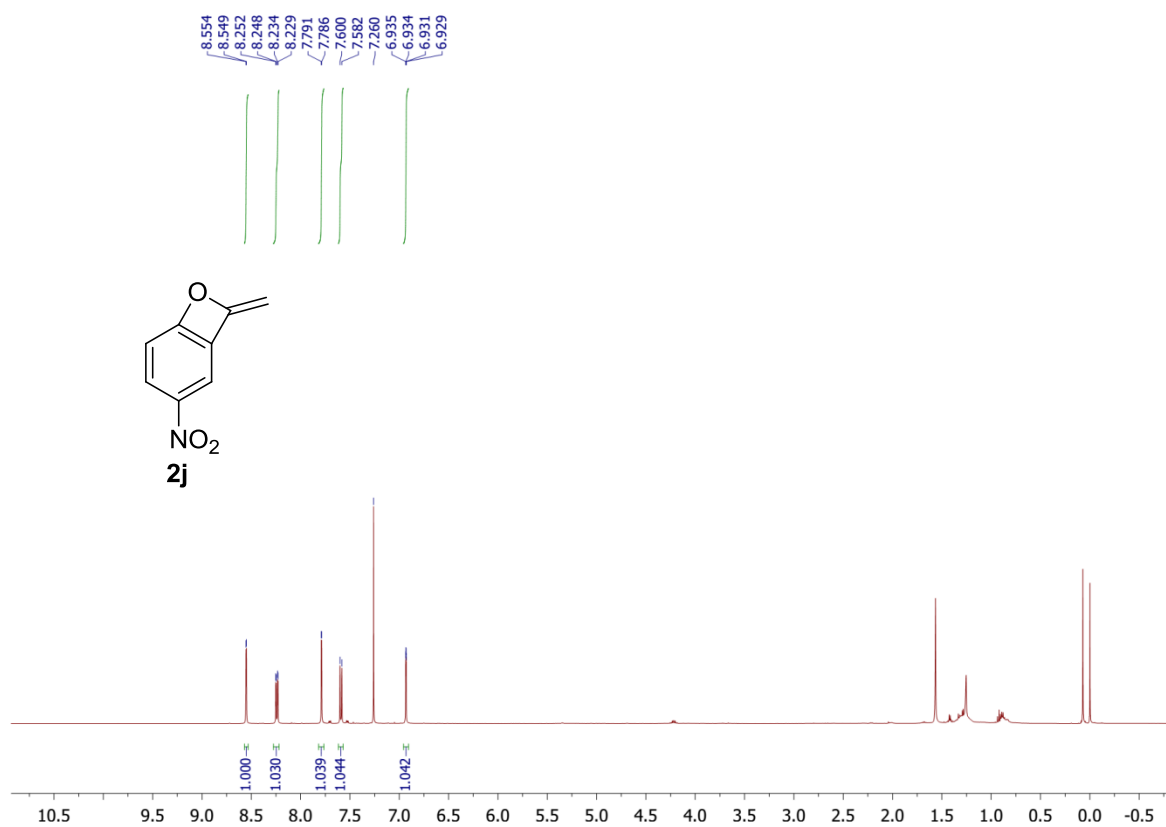

**2j**,  $^{13}\text{C}$  NMR, 126 MHz,  $\text{CDCl}_3$

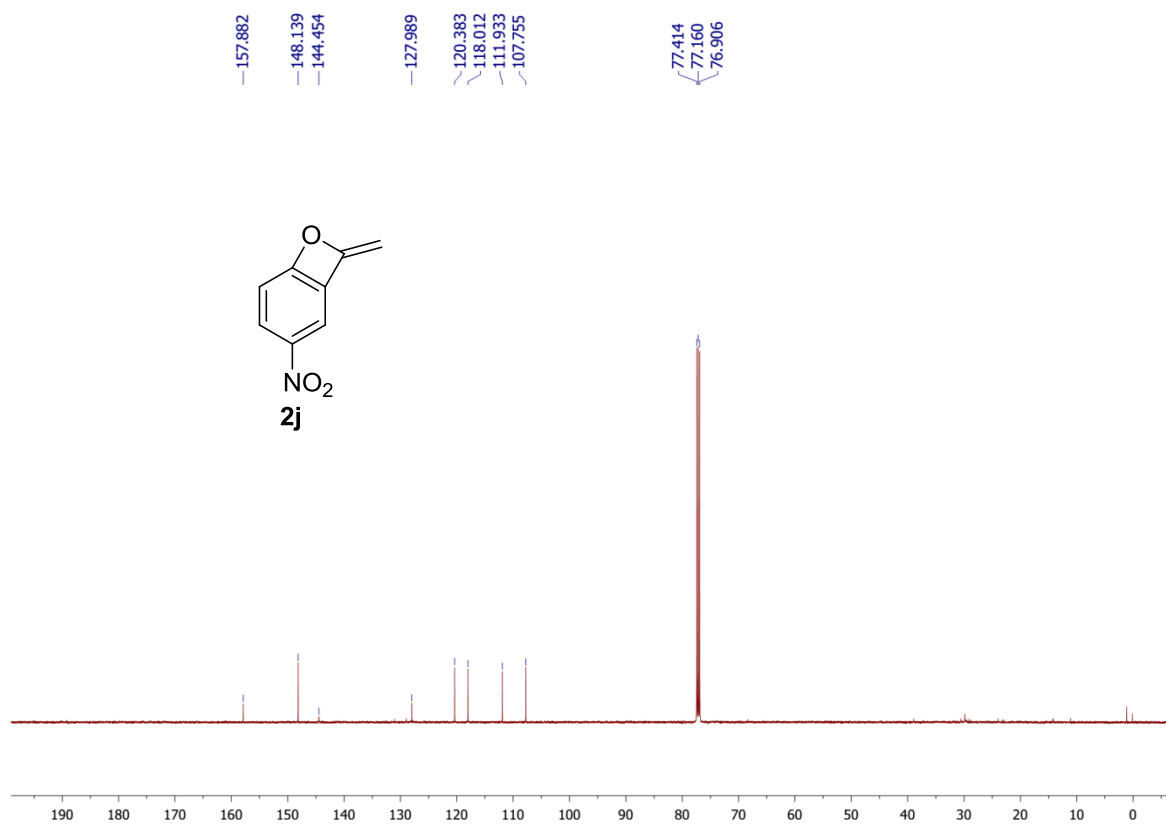



**2k**,  $^1\text{H}$  NMR, 500 MHz,  $\text{CDCl}_3$

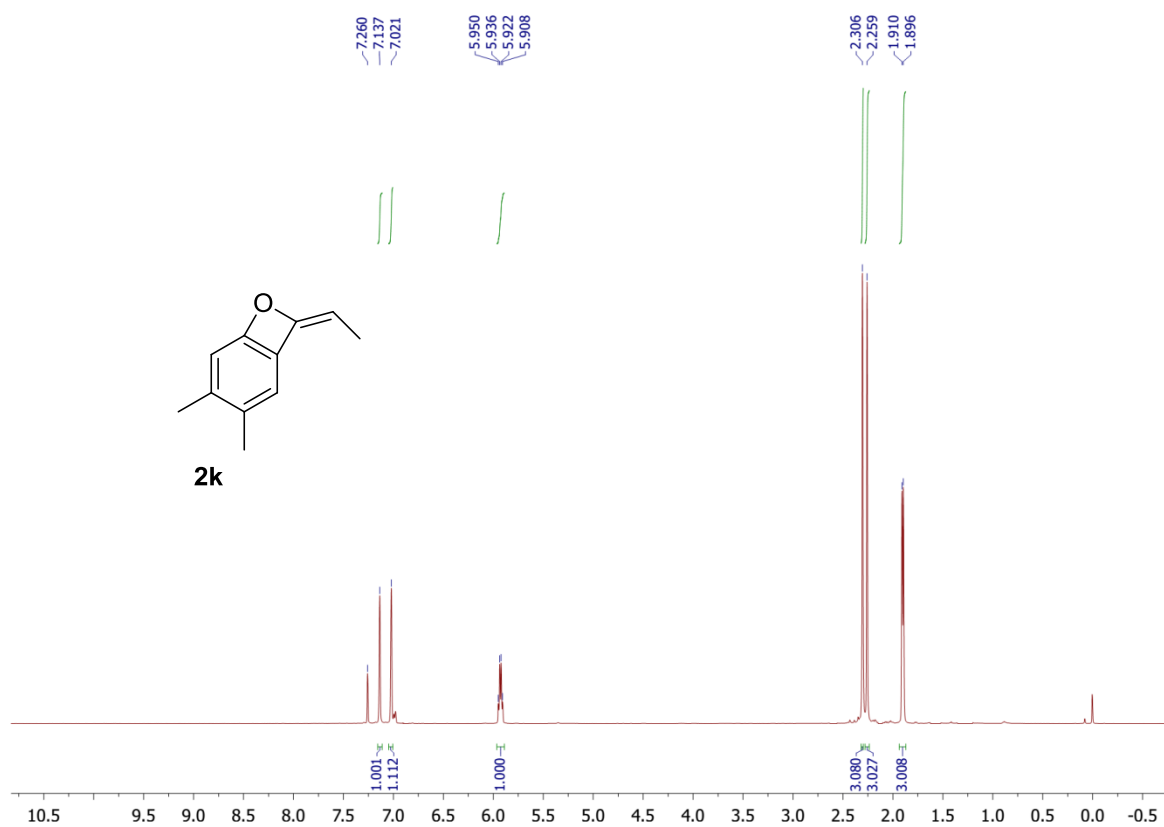

**2k**,  $^{13}\text{C}$  NMR, 126 MHz,  $\text{CDCl}_3$

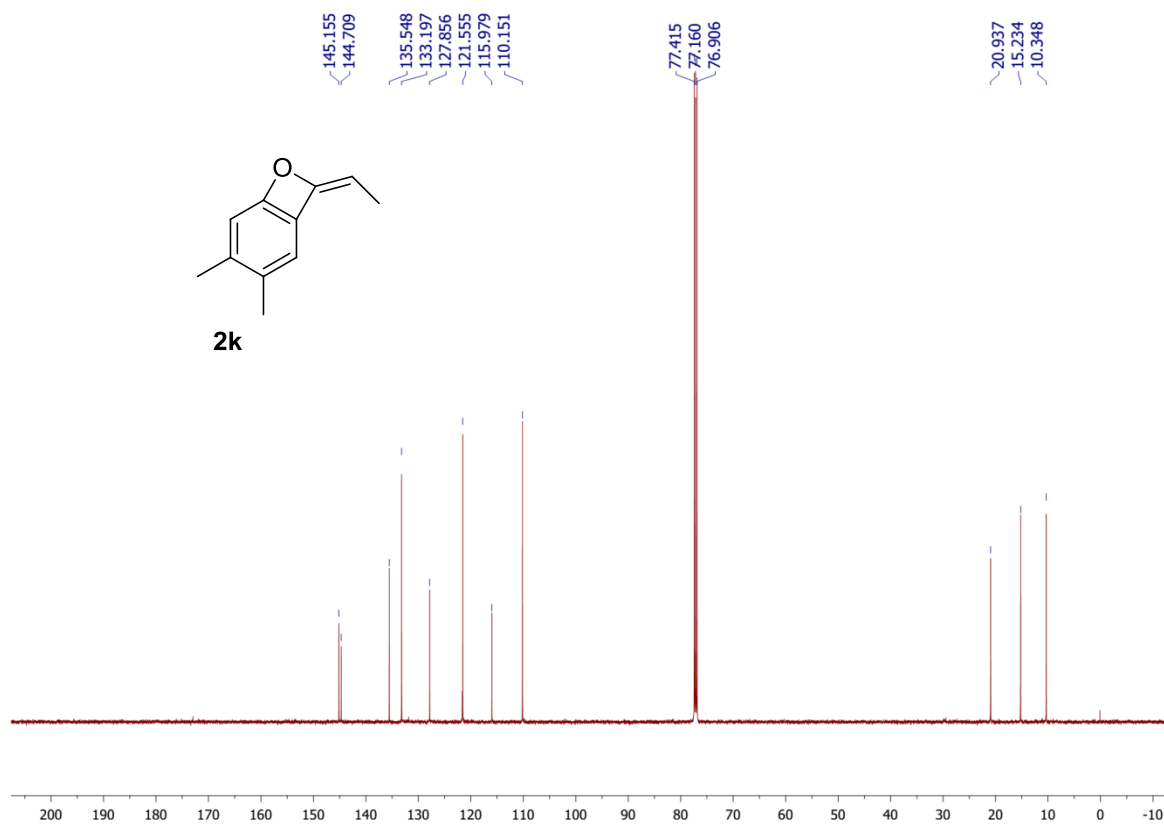

**21**,  $^1\text{H}$  NMR, 500 MHz,  $\text{CDCl}_3$

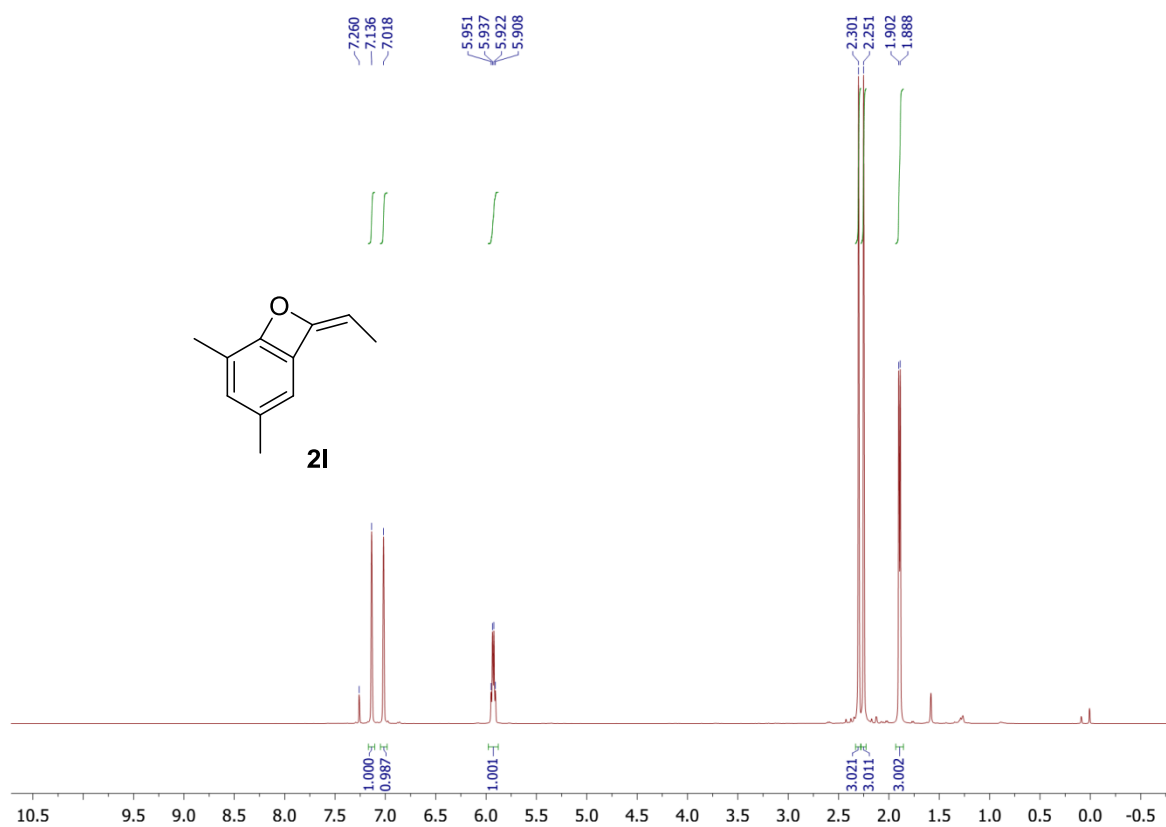

**21**,  $^{13}\text{C}$  NMR, 126 MHz,  $\text{CDCl}_3$

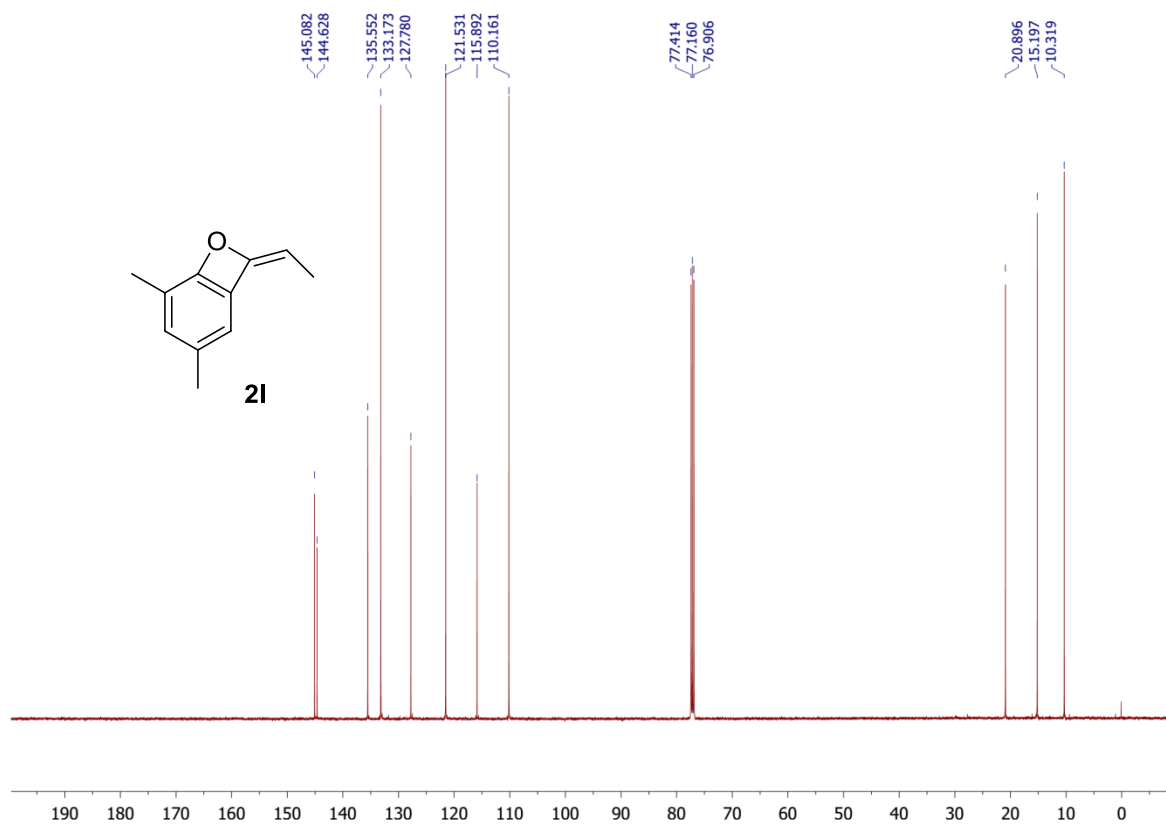

**2m**,  $^1\text{H}$  NMR, 500 MHz,  $\text{CDCl}_3$

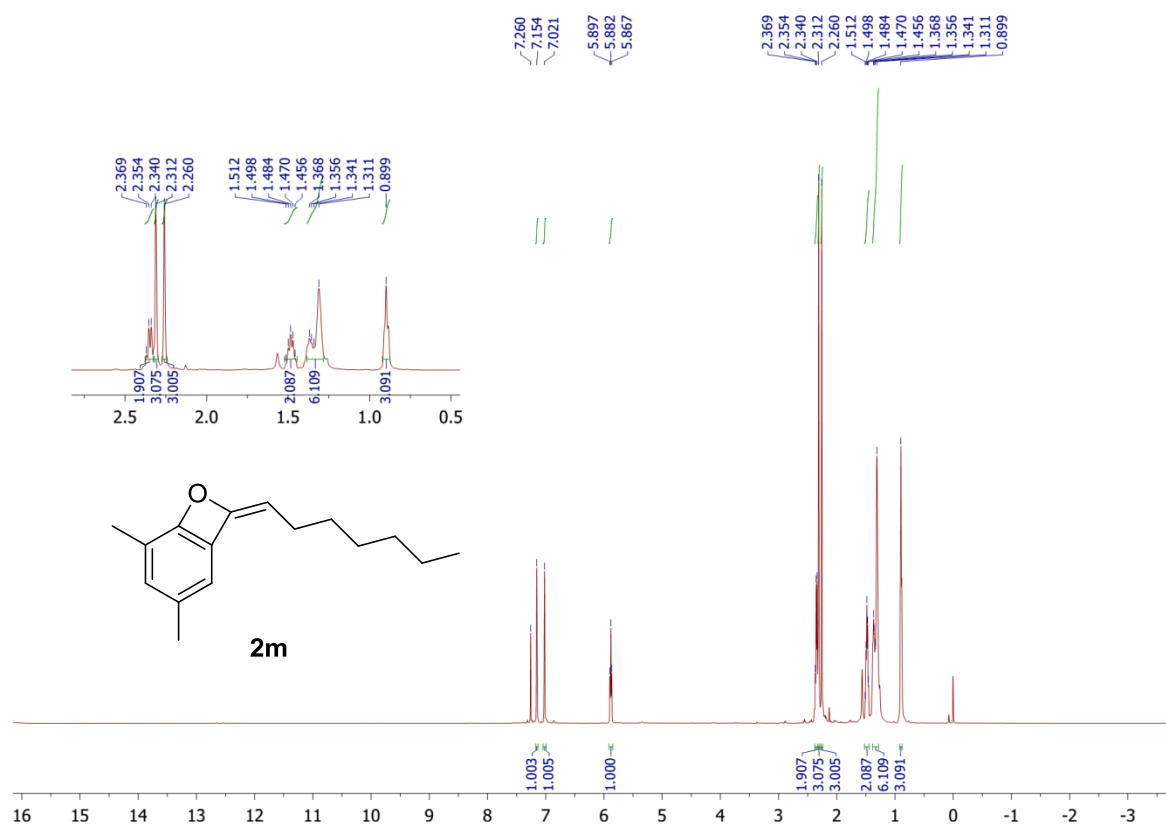

**2m**,  $^{13}\text{C}$  NMR, 126 MHz,  $\text{CDCl}_3$

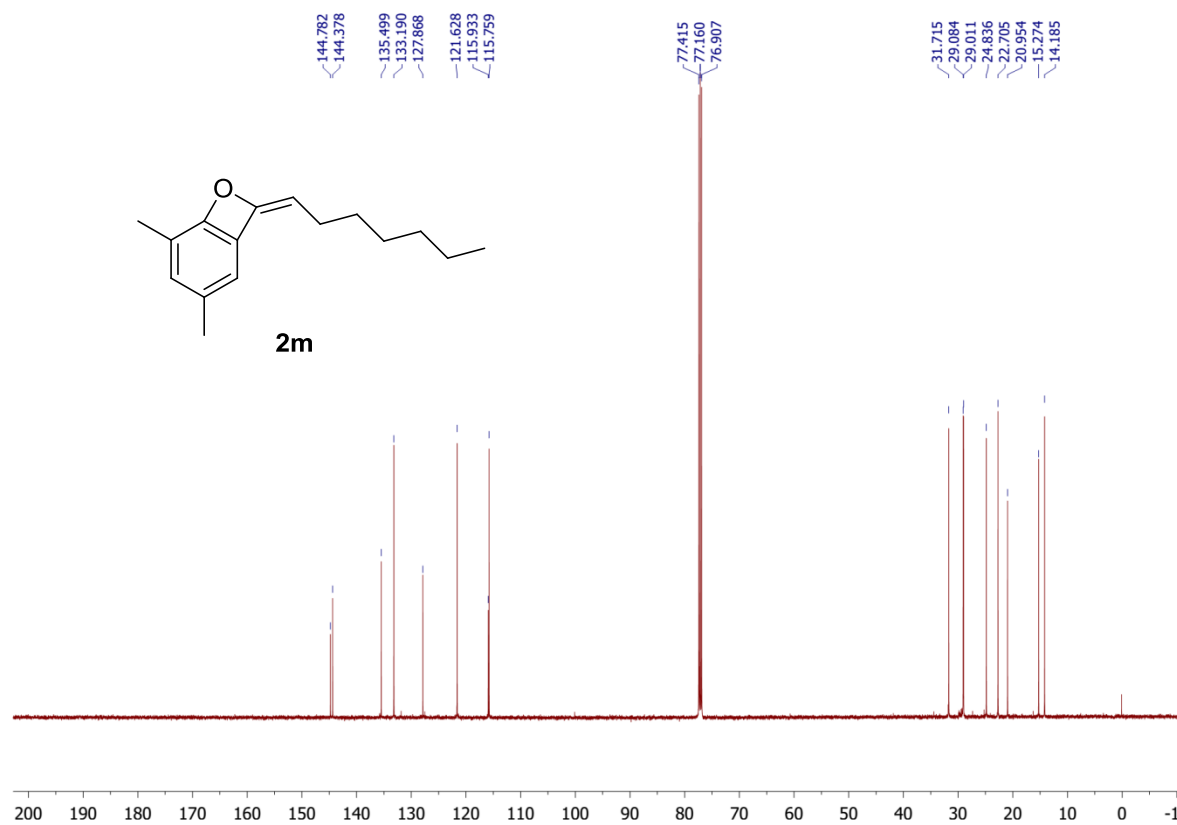

**2n**,  $^1\text{H}$  NMR, 500 MHz,  $\text{CDCl}_3$

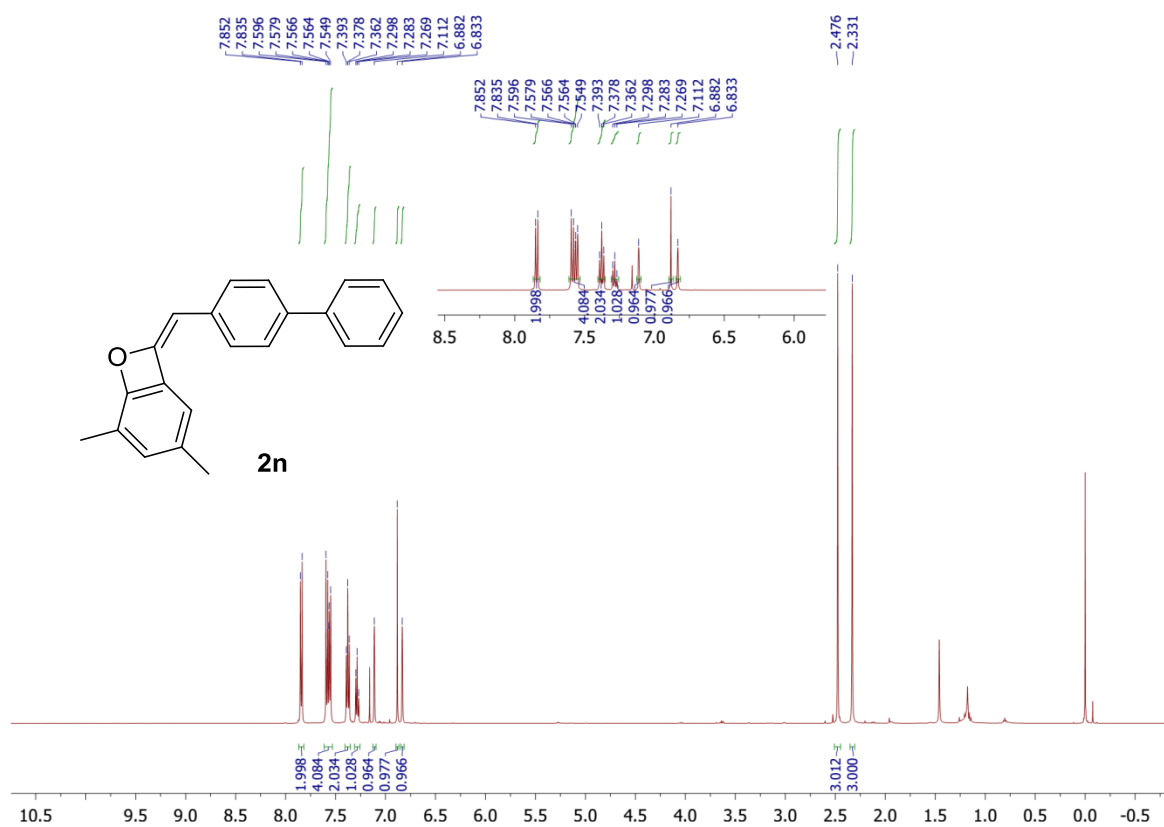

**2n**,  $^{13}\text{C}$  NMR, 126 MHz,  $\text{CDCl}_3$

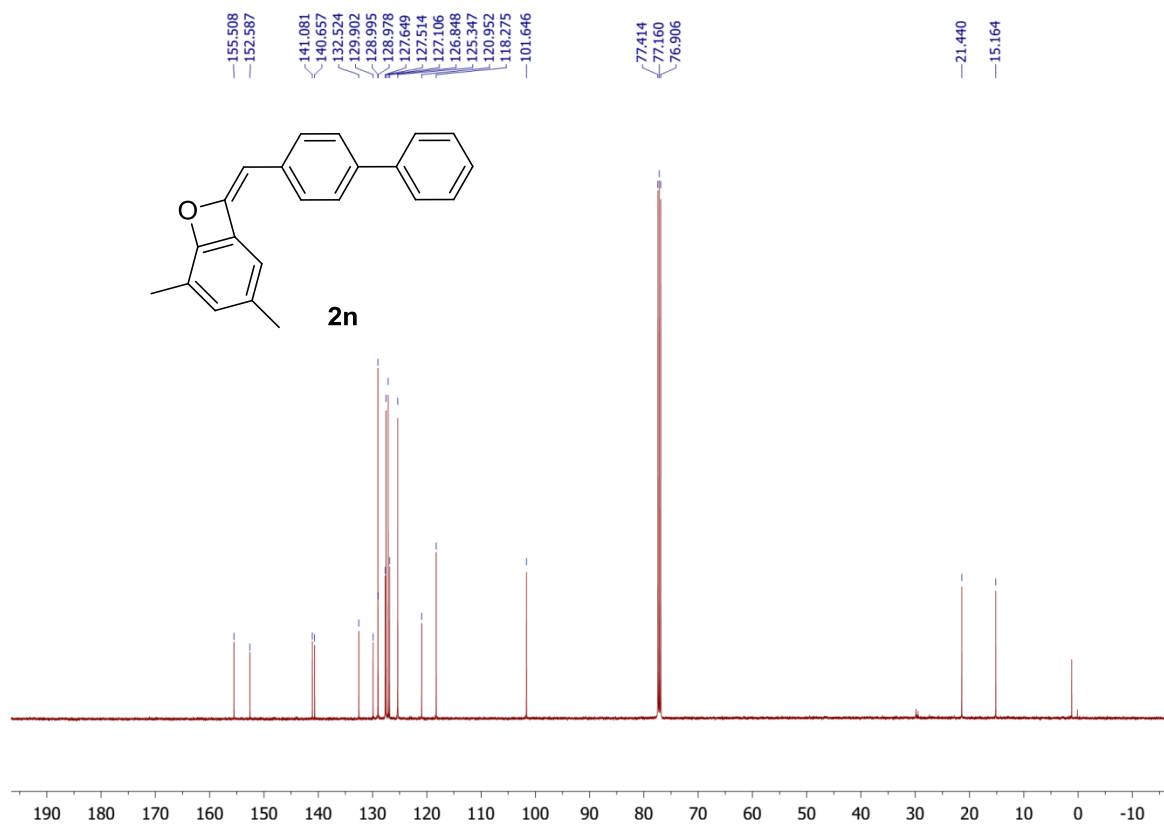

**2o**,  $^1\text{H}$  NMR, 500 MHz,  $\text{CDCl}_3$

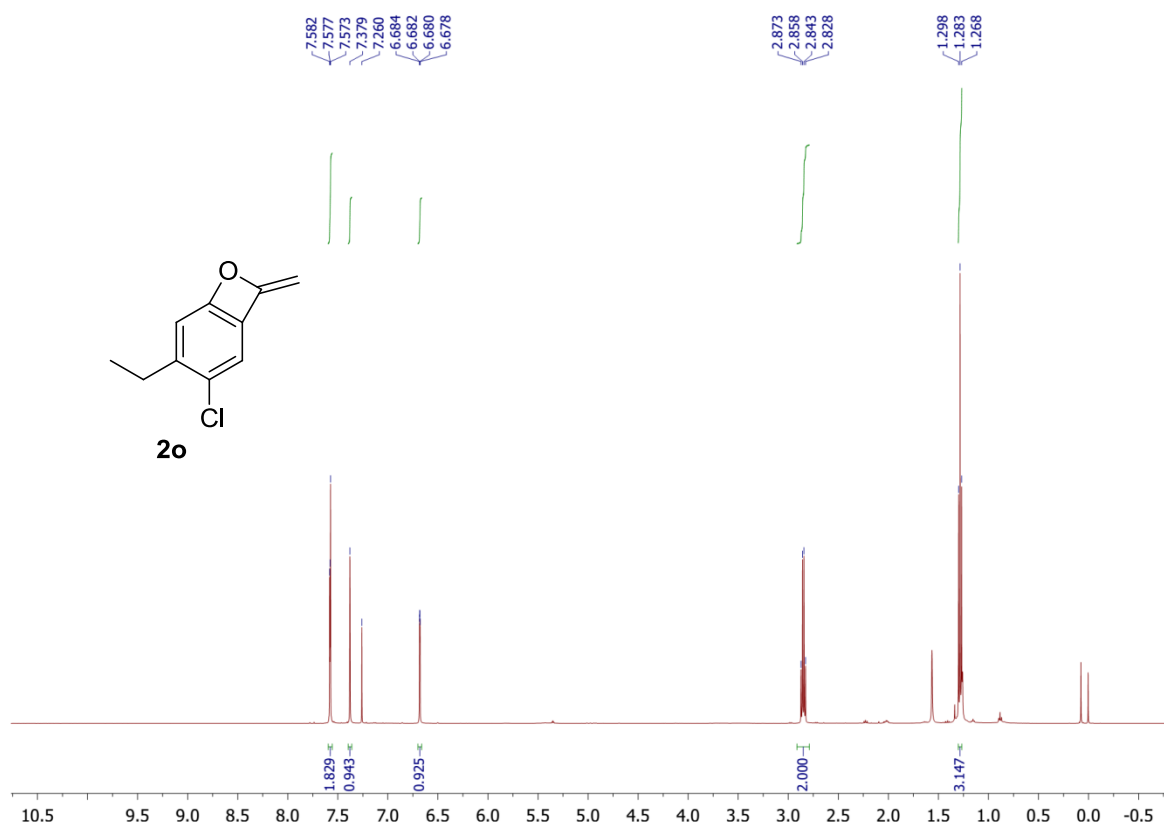

**2o**,  $^{13}\text{C}$  NMR, 126 MHz,  $\text{CDCl}_3$

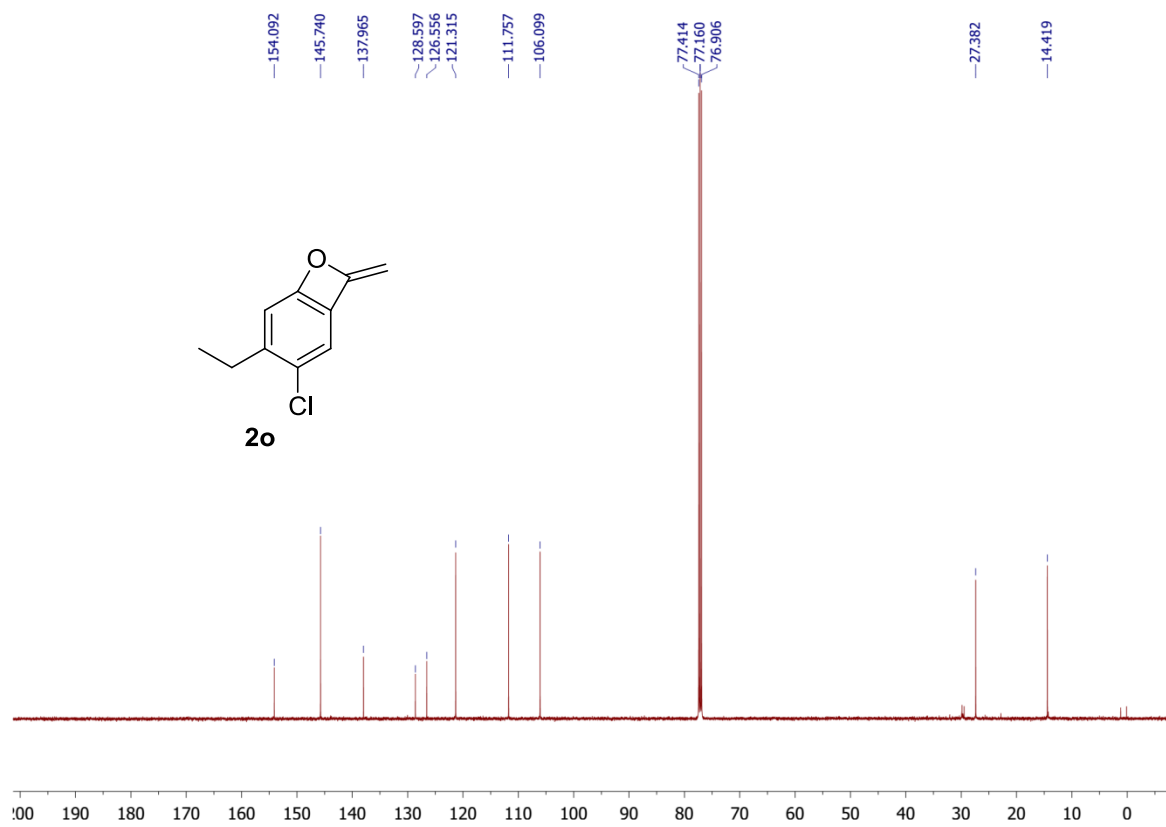

**2p**,  $^1\text{H}$  NMR, 500 MHz,  $\text{CDCl}_3$

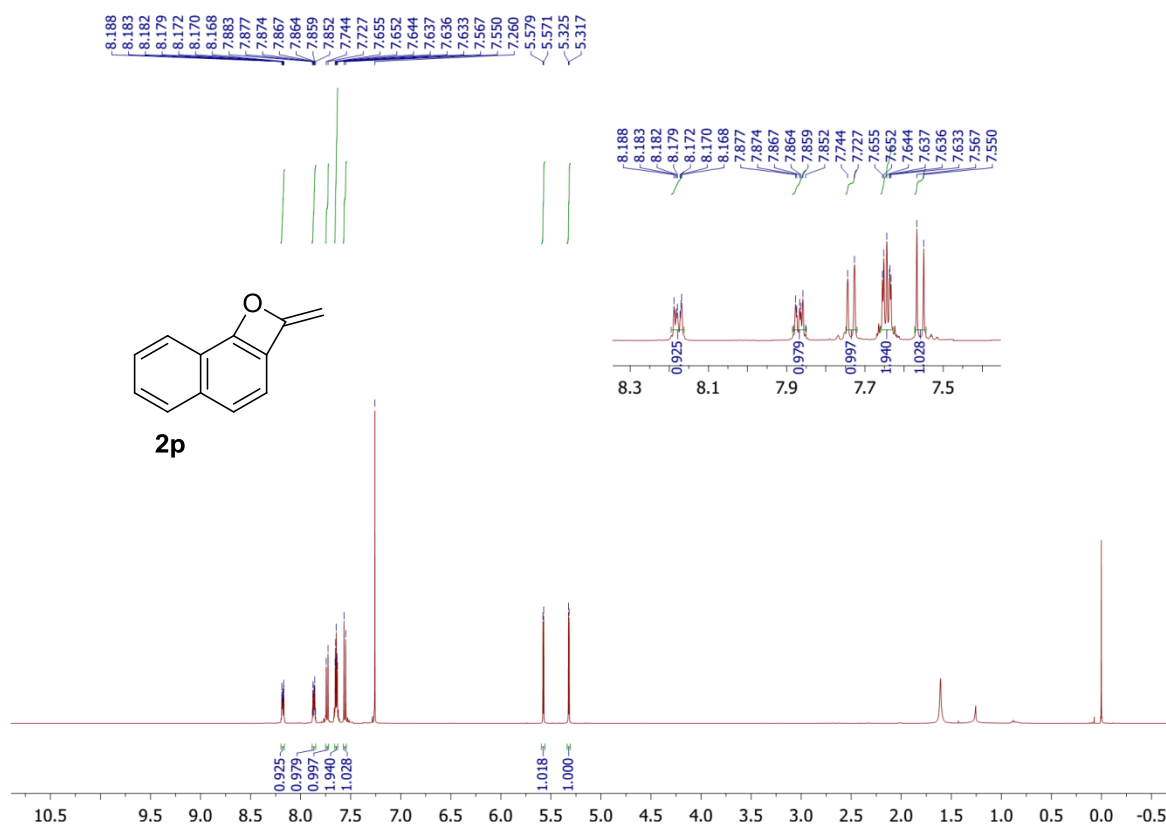

**2p**,  $^{13}\text{C}$  NMR, 126 MHz,  $\text{CDCl}_3$

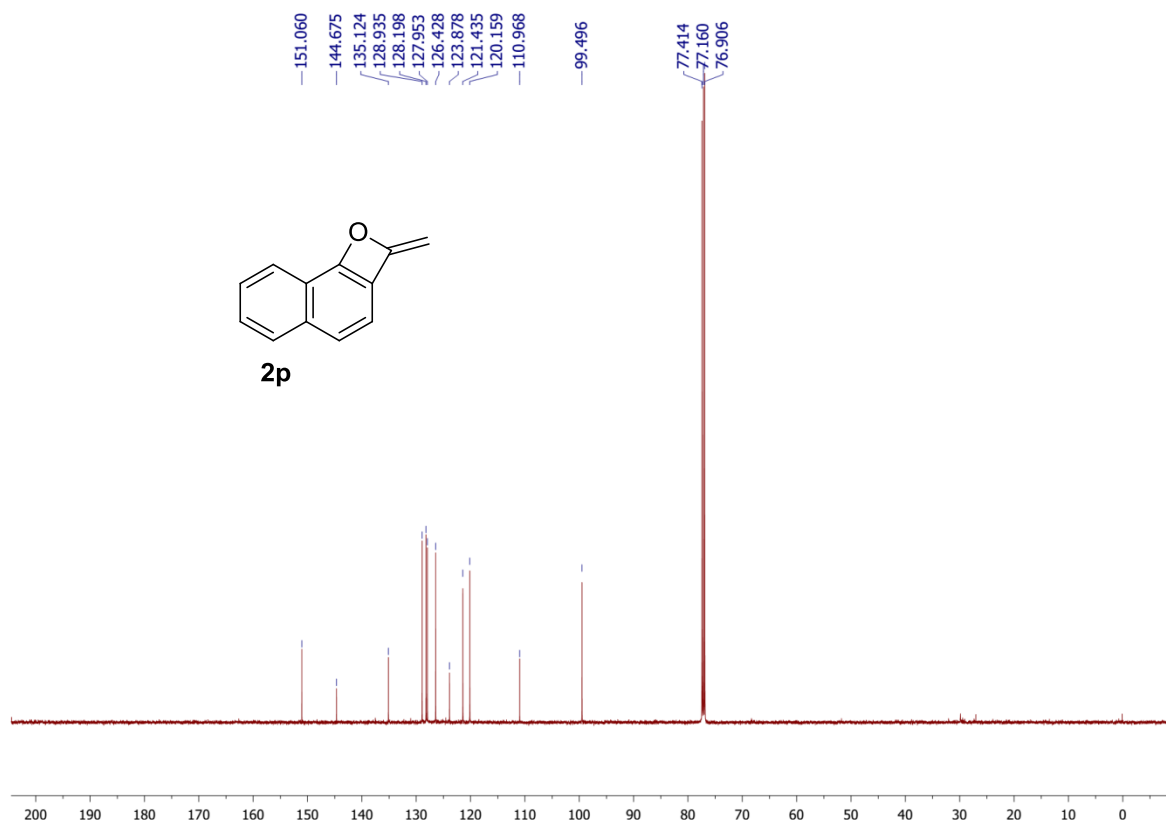

**2q**,  $^1\text{H}$  NMR, 500 MHz,  $\text{CDCl}_3$

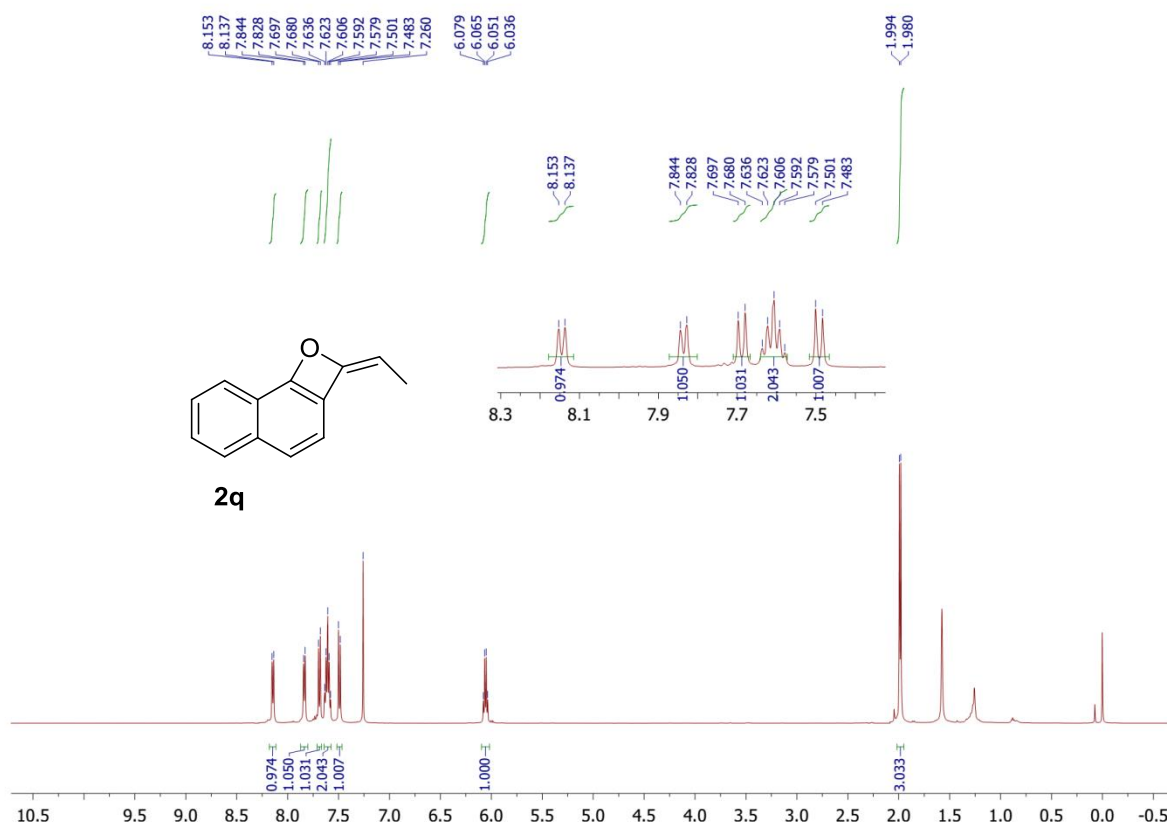

**2q**,  $^{13}\text{C}$  NMR, 126 MHz,  $\text{CDCl}_3$

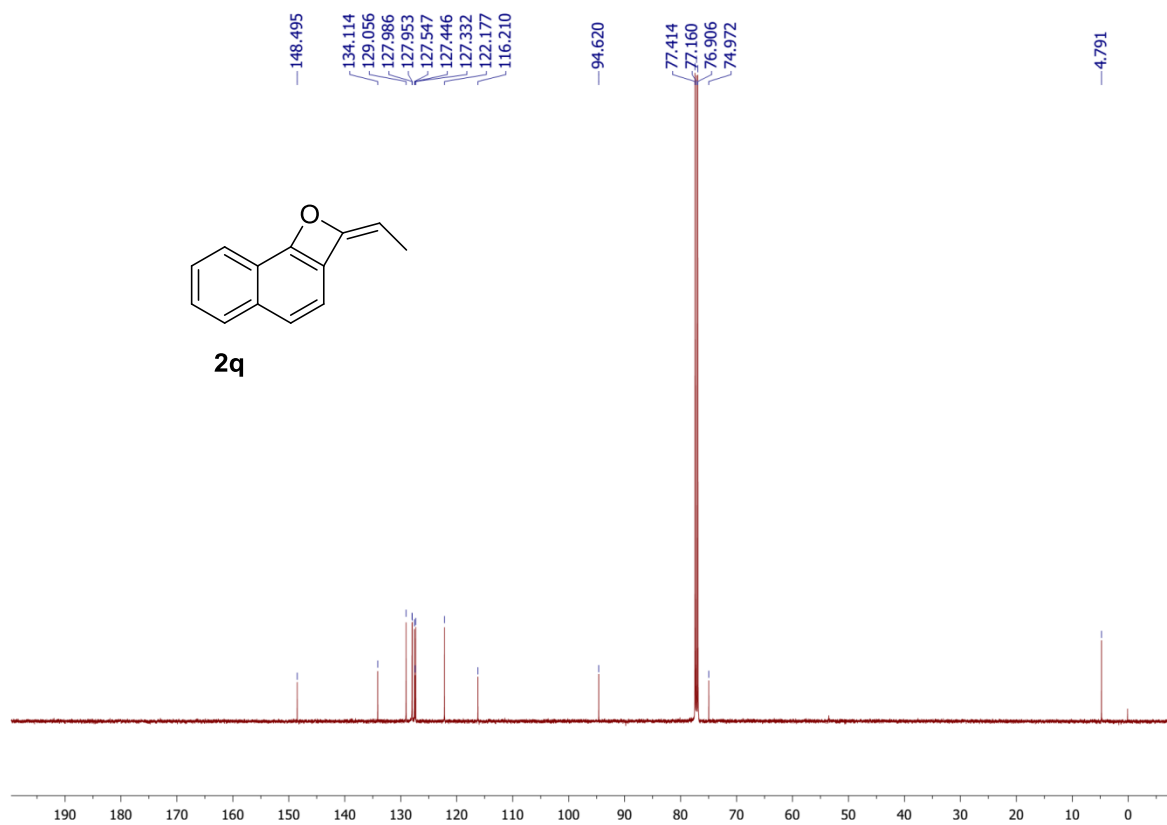

**2r**,  $^1\text{H}$  NMR, 500 MHz,  $\text{CDCl}_3$

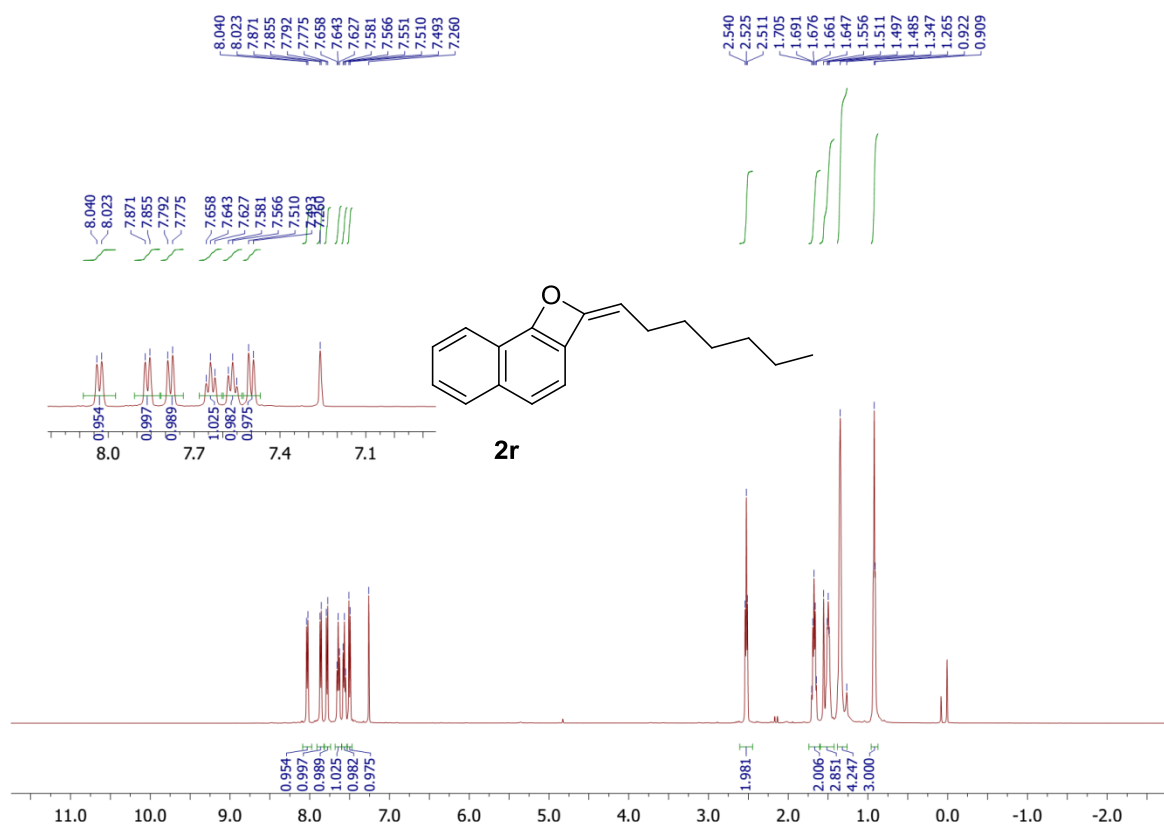

**2r**,  $^{13}\text{C}$  NMR, 126 MHz,  $\text{CDCl}_3$

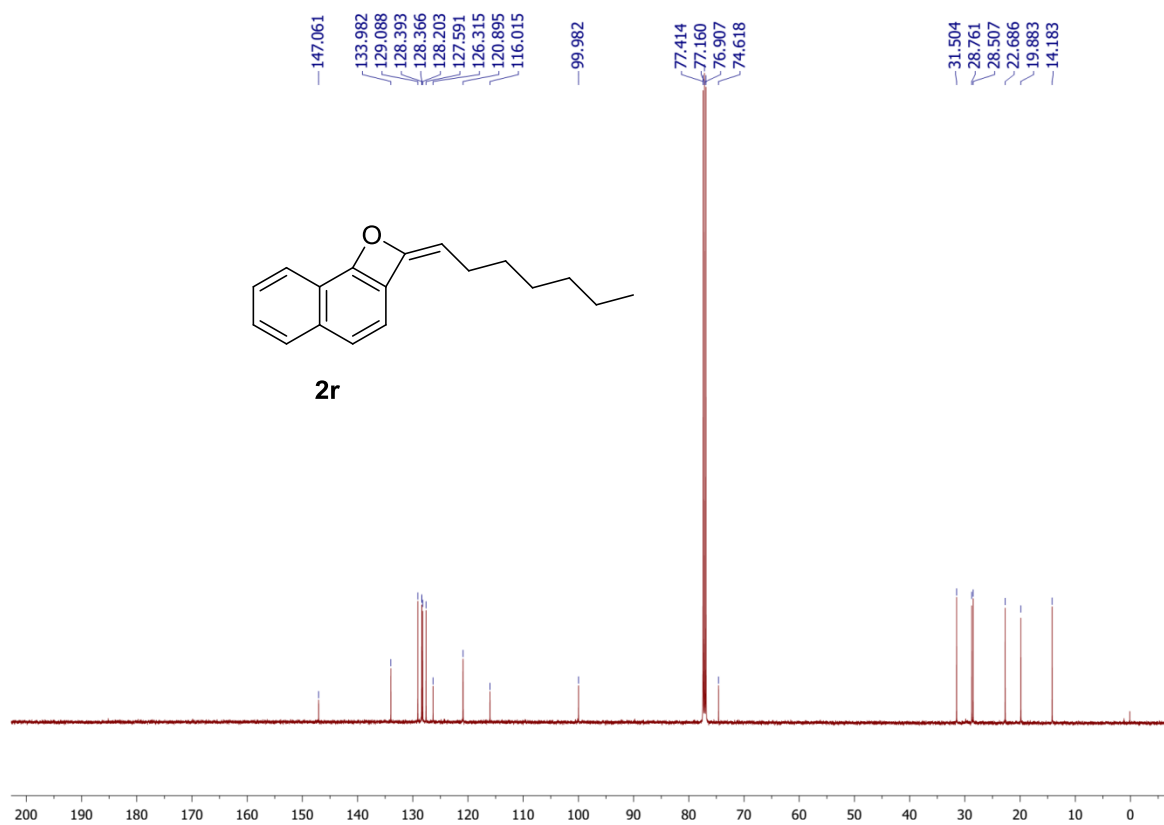



**2s**,  $^1\text{H}$  NMR, 500 MHz,  $\text{CDCl}_3$

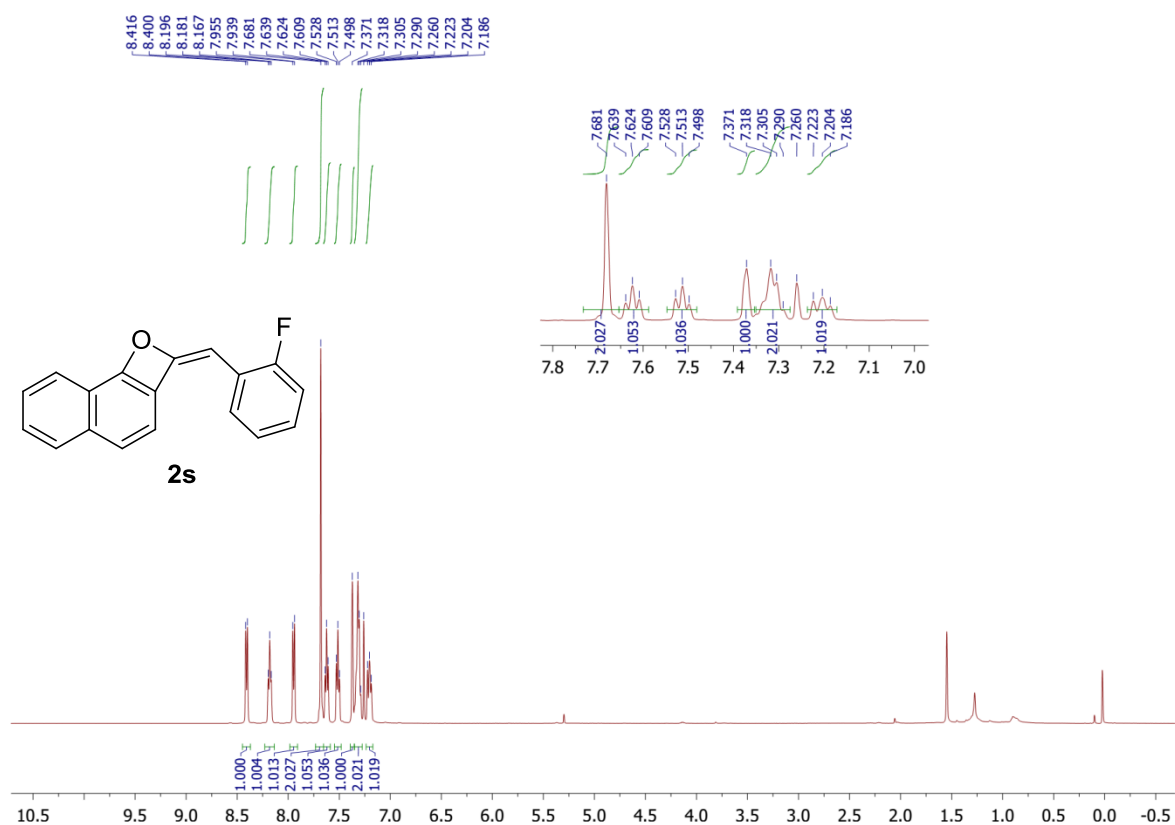

**2s**,  $^{13}\text{C}$  NMR, 126 MHz,  $\text{CDCl}_3$

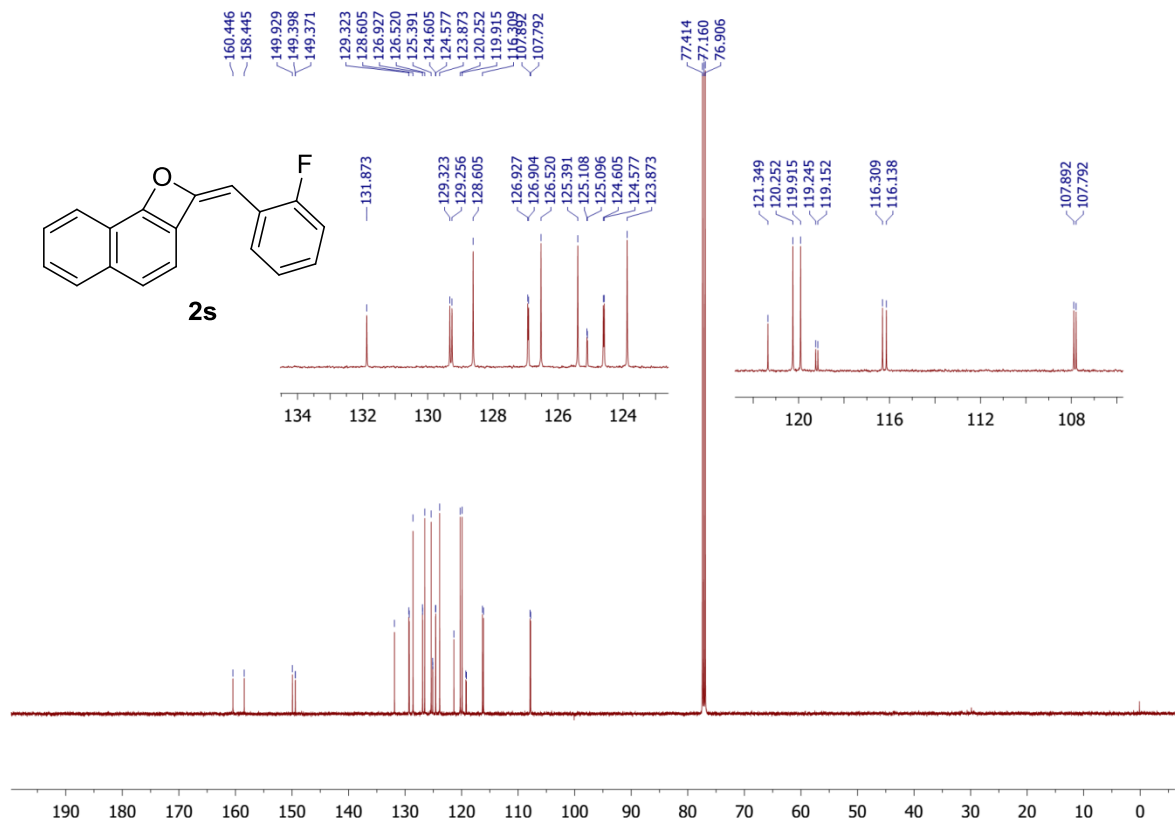

Supplement: Beilstein_J_Org_Chem-15-976-s001.pdf [file Beilstein_J_Org_Chem-15-976-s001.pdf]
